# Supplementary material for: Synthesis, characterization, in vitro antibacterial and in vivo antimalarial studies of arylsulphonamoyl ala-val carboxamide dipeptides
Source: Research Square preprint supplement (doi:10.21203/rs.3.rs-5764328/v1), 2025-01-09

**SUPPLEMENTARY MATERIALS**

Article Title: **Synthesis, characterization, *in vitro* antibacterial and *in vivo* antimalarial studies of arylsulphonamoyl ala-val carboxamide dipeptides**

Journal name: **Organic Chemistry Research**

Author names: **Ogakwu Sunday Adoga1*, U. C. Okoro1, D. Dattatraya2, M. Shukula2, Maya Makatini3**

Authors’ affiliations

**1Department of Pure and Industrial Chemistry, University of Nigeria, Nsukka**

**2Department of Chemistry, Indian Institute of Technology, Kanpur**

**3Department of Chemistry, University of Witwatersrand, Johannesburg, South Africa**

Corresponding author email: **adogasundayo@gmail.com**

**APPENDIX I**

1H, 13C NMR and MS Spectra of Compounds

**2-(phenylsulfonamido)propanoic acid**

Spectrum 1a

**2-(4-methylphenylsulfonamido)propanoic acid**

Spectrum 1b

**2-(4-nitrophenylsulfonamido)propanoic acid**

Spectrum 1c

**tert-butyl (1-(ethylamino)-3-methyl-1-oxobutan-2-yl)carbamate**

Spectrum 2a

**tert-butyl (3-methyl-1-oxo-1-(propylamino)butan-2-yl)carbamate**

Spectrum 2b

**tert-butyl (1-(butylamino)-3-methyl-1-oxobutan-2-yl)carbamate**

Spectrum 2c

**tert-butyl (3-methyl-1-oxo-1-(piperidin-1-yl)butan-2-yl)carbamate**

Spectrum 2d

**tert-butyl (1-(dimethylamino)-3-methyl-1-oxobutan-2-yl)carbamate**

Spectrum 2e

**tert-butyl (3-methyl-1-oxo-1-(1H-pyrazol-1-yl)butan-2-yl)carbamate**

Spectrum 2f

**tert-butyl (3-methyl-1-oxo-1-(pyrrolidin-1-yl)butan-2-yl)carbamate**

Spectrum 2g

**tert-butyl (1-(diethylamino)-3-methyl-1-oxobutan-2-yl)carbamate**

Spectrum 2h

**N-ethyl-3-methyl-2-(2-(phenylsulfonamido)propanamido)butanamide (3a)**

Spectrum 1

Spectrum 2

***N*-ethyl-3-methyl-2-(2-(4-methylphenylsulfonamido)propanamido)butanamide (3b)** Spectrum 3

Spectrum 4

***N*-ethyl-3-methyl-2-(2-(4-nitrophenylsulfonamido)propanamido)butanamide (3c)**

Spectrum 5

Spectrum 6

Spectrum 7

**3-methyl-2-(2-(phenylsulfonamido)propanamido)-N-propylbutanamide (3d)**

Spectrum 8

Spectrum 9
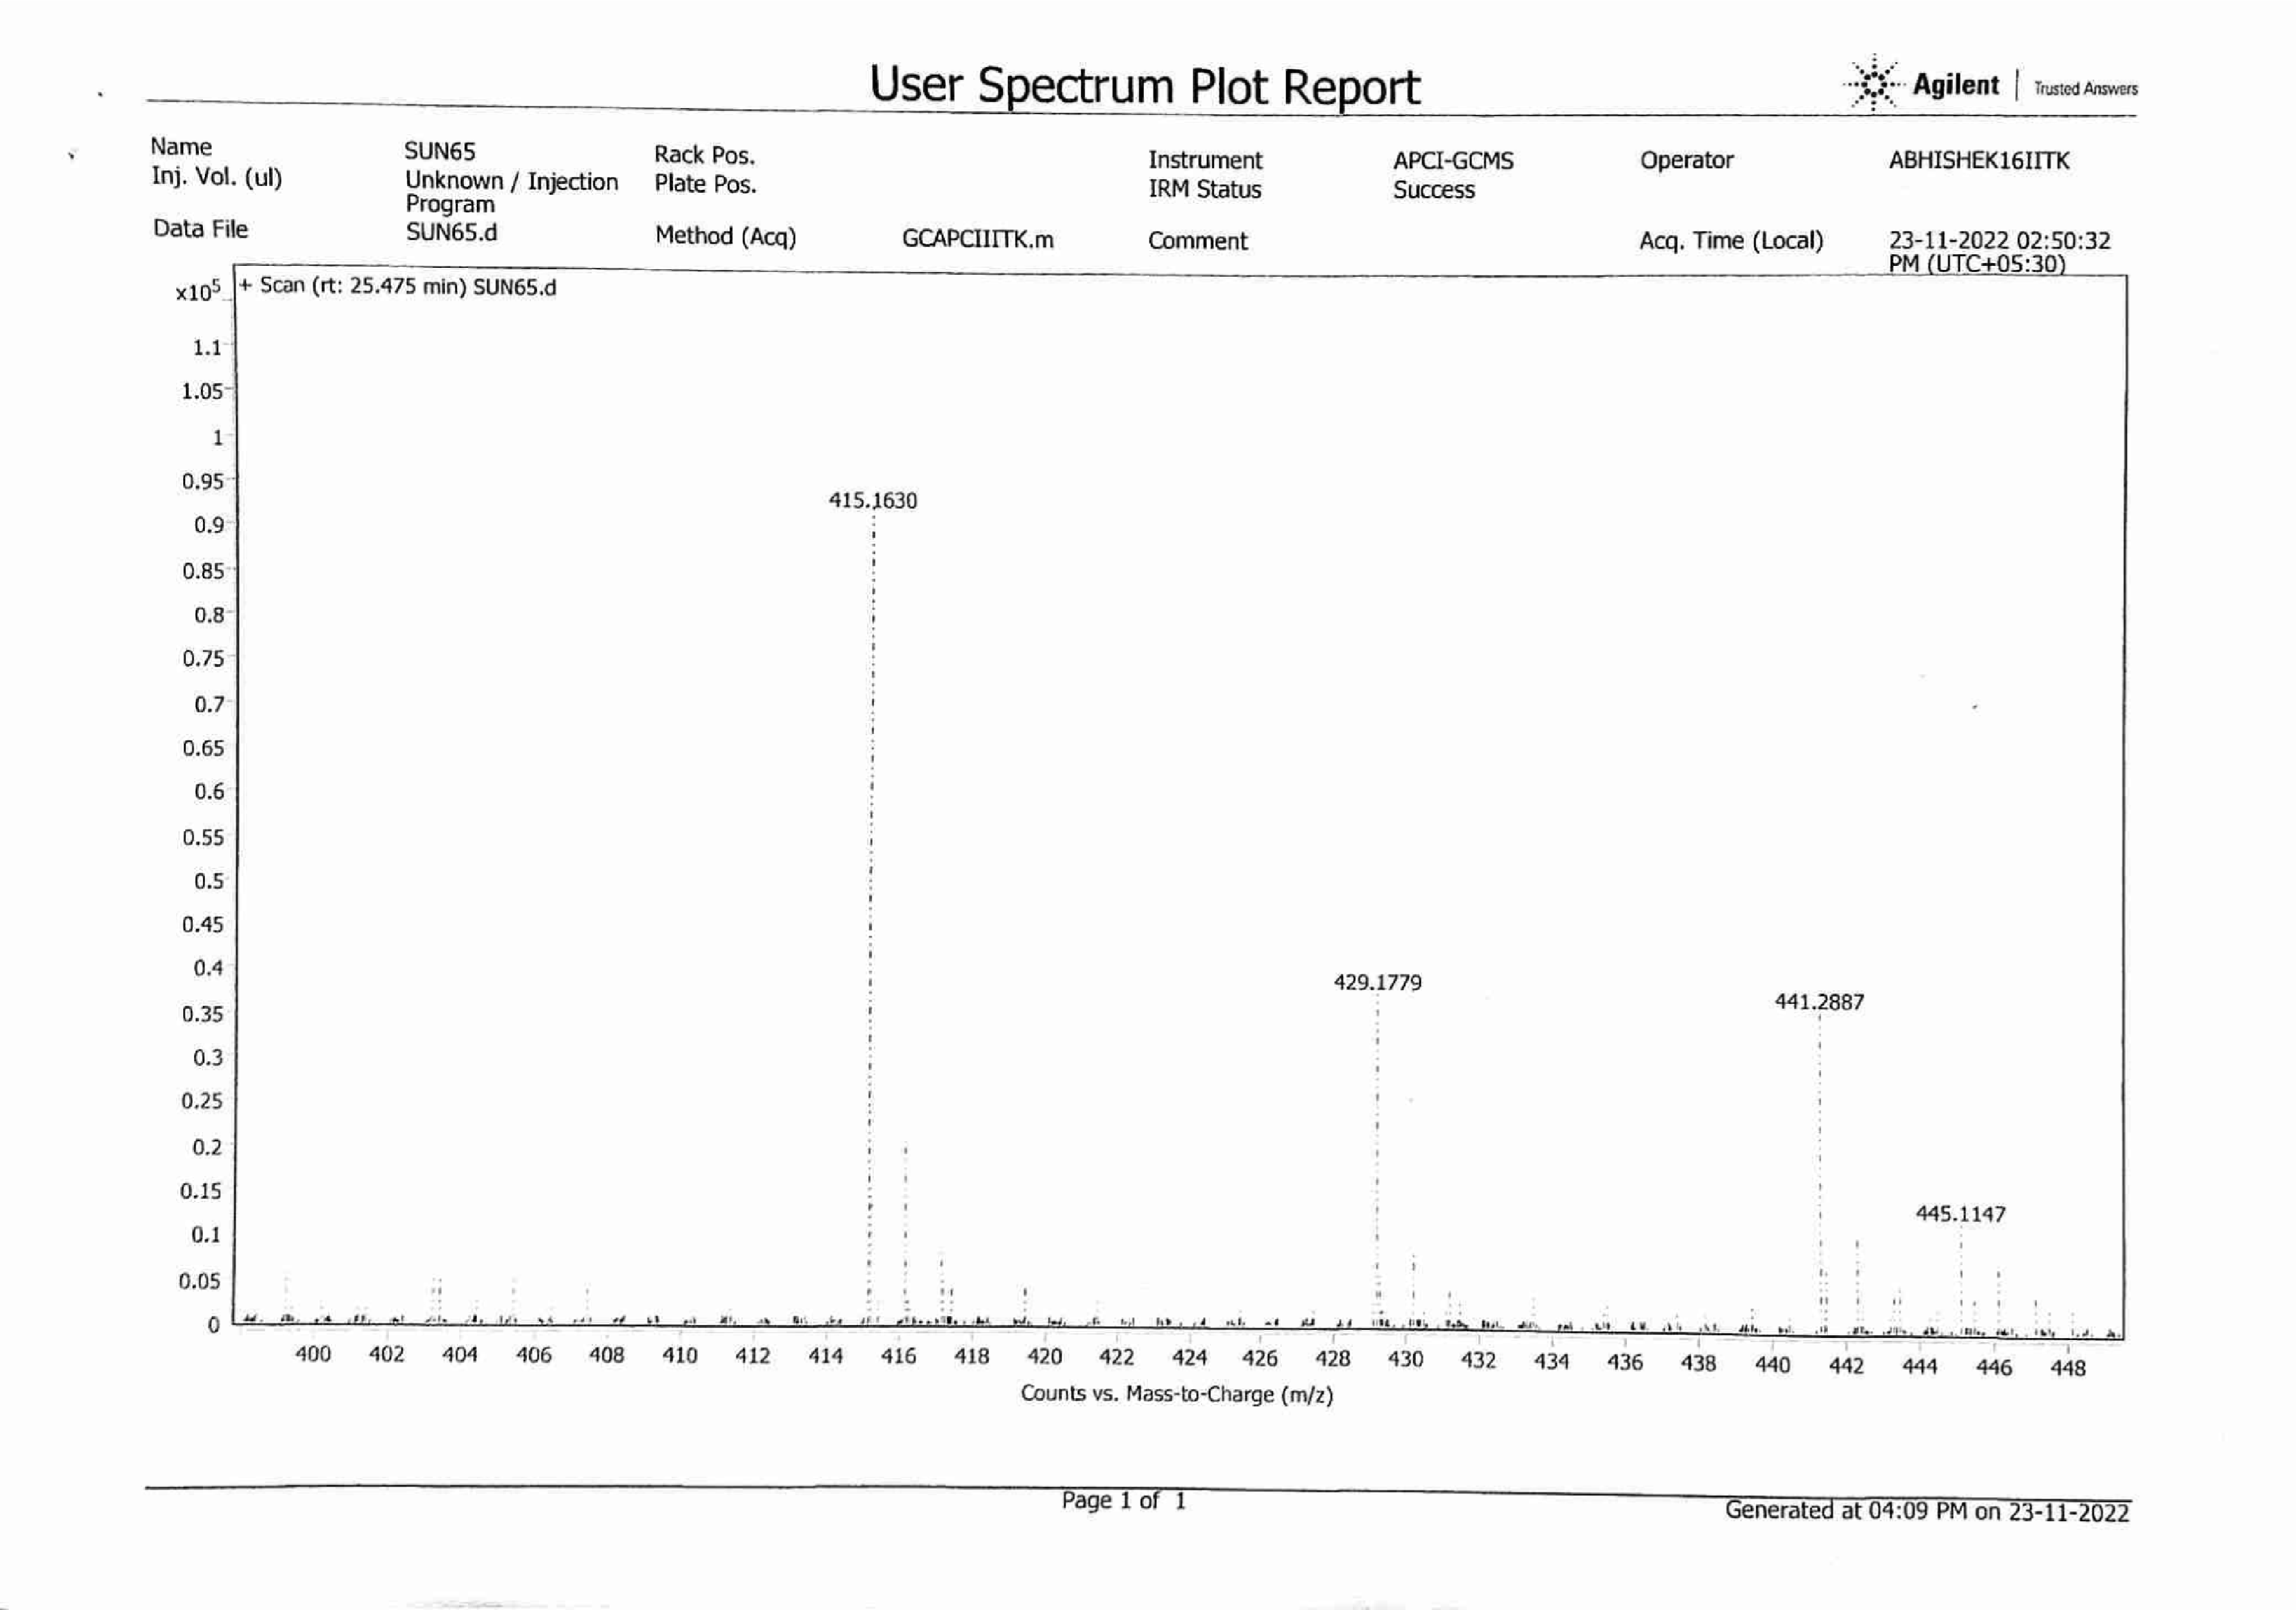
Spectrum 10

**3-methyl-2-(2-(4-methylphenylsulfonamido)propanamido)-N-propylbutanamide (3e)**

Spectrum 11

Spectrum 12

**3-methyl-2-(2-(4-nitrophenylsulfonamido)propanamido)-N-propylbutanamide (3f)**

Spectrum 13

Spectrum 14


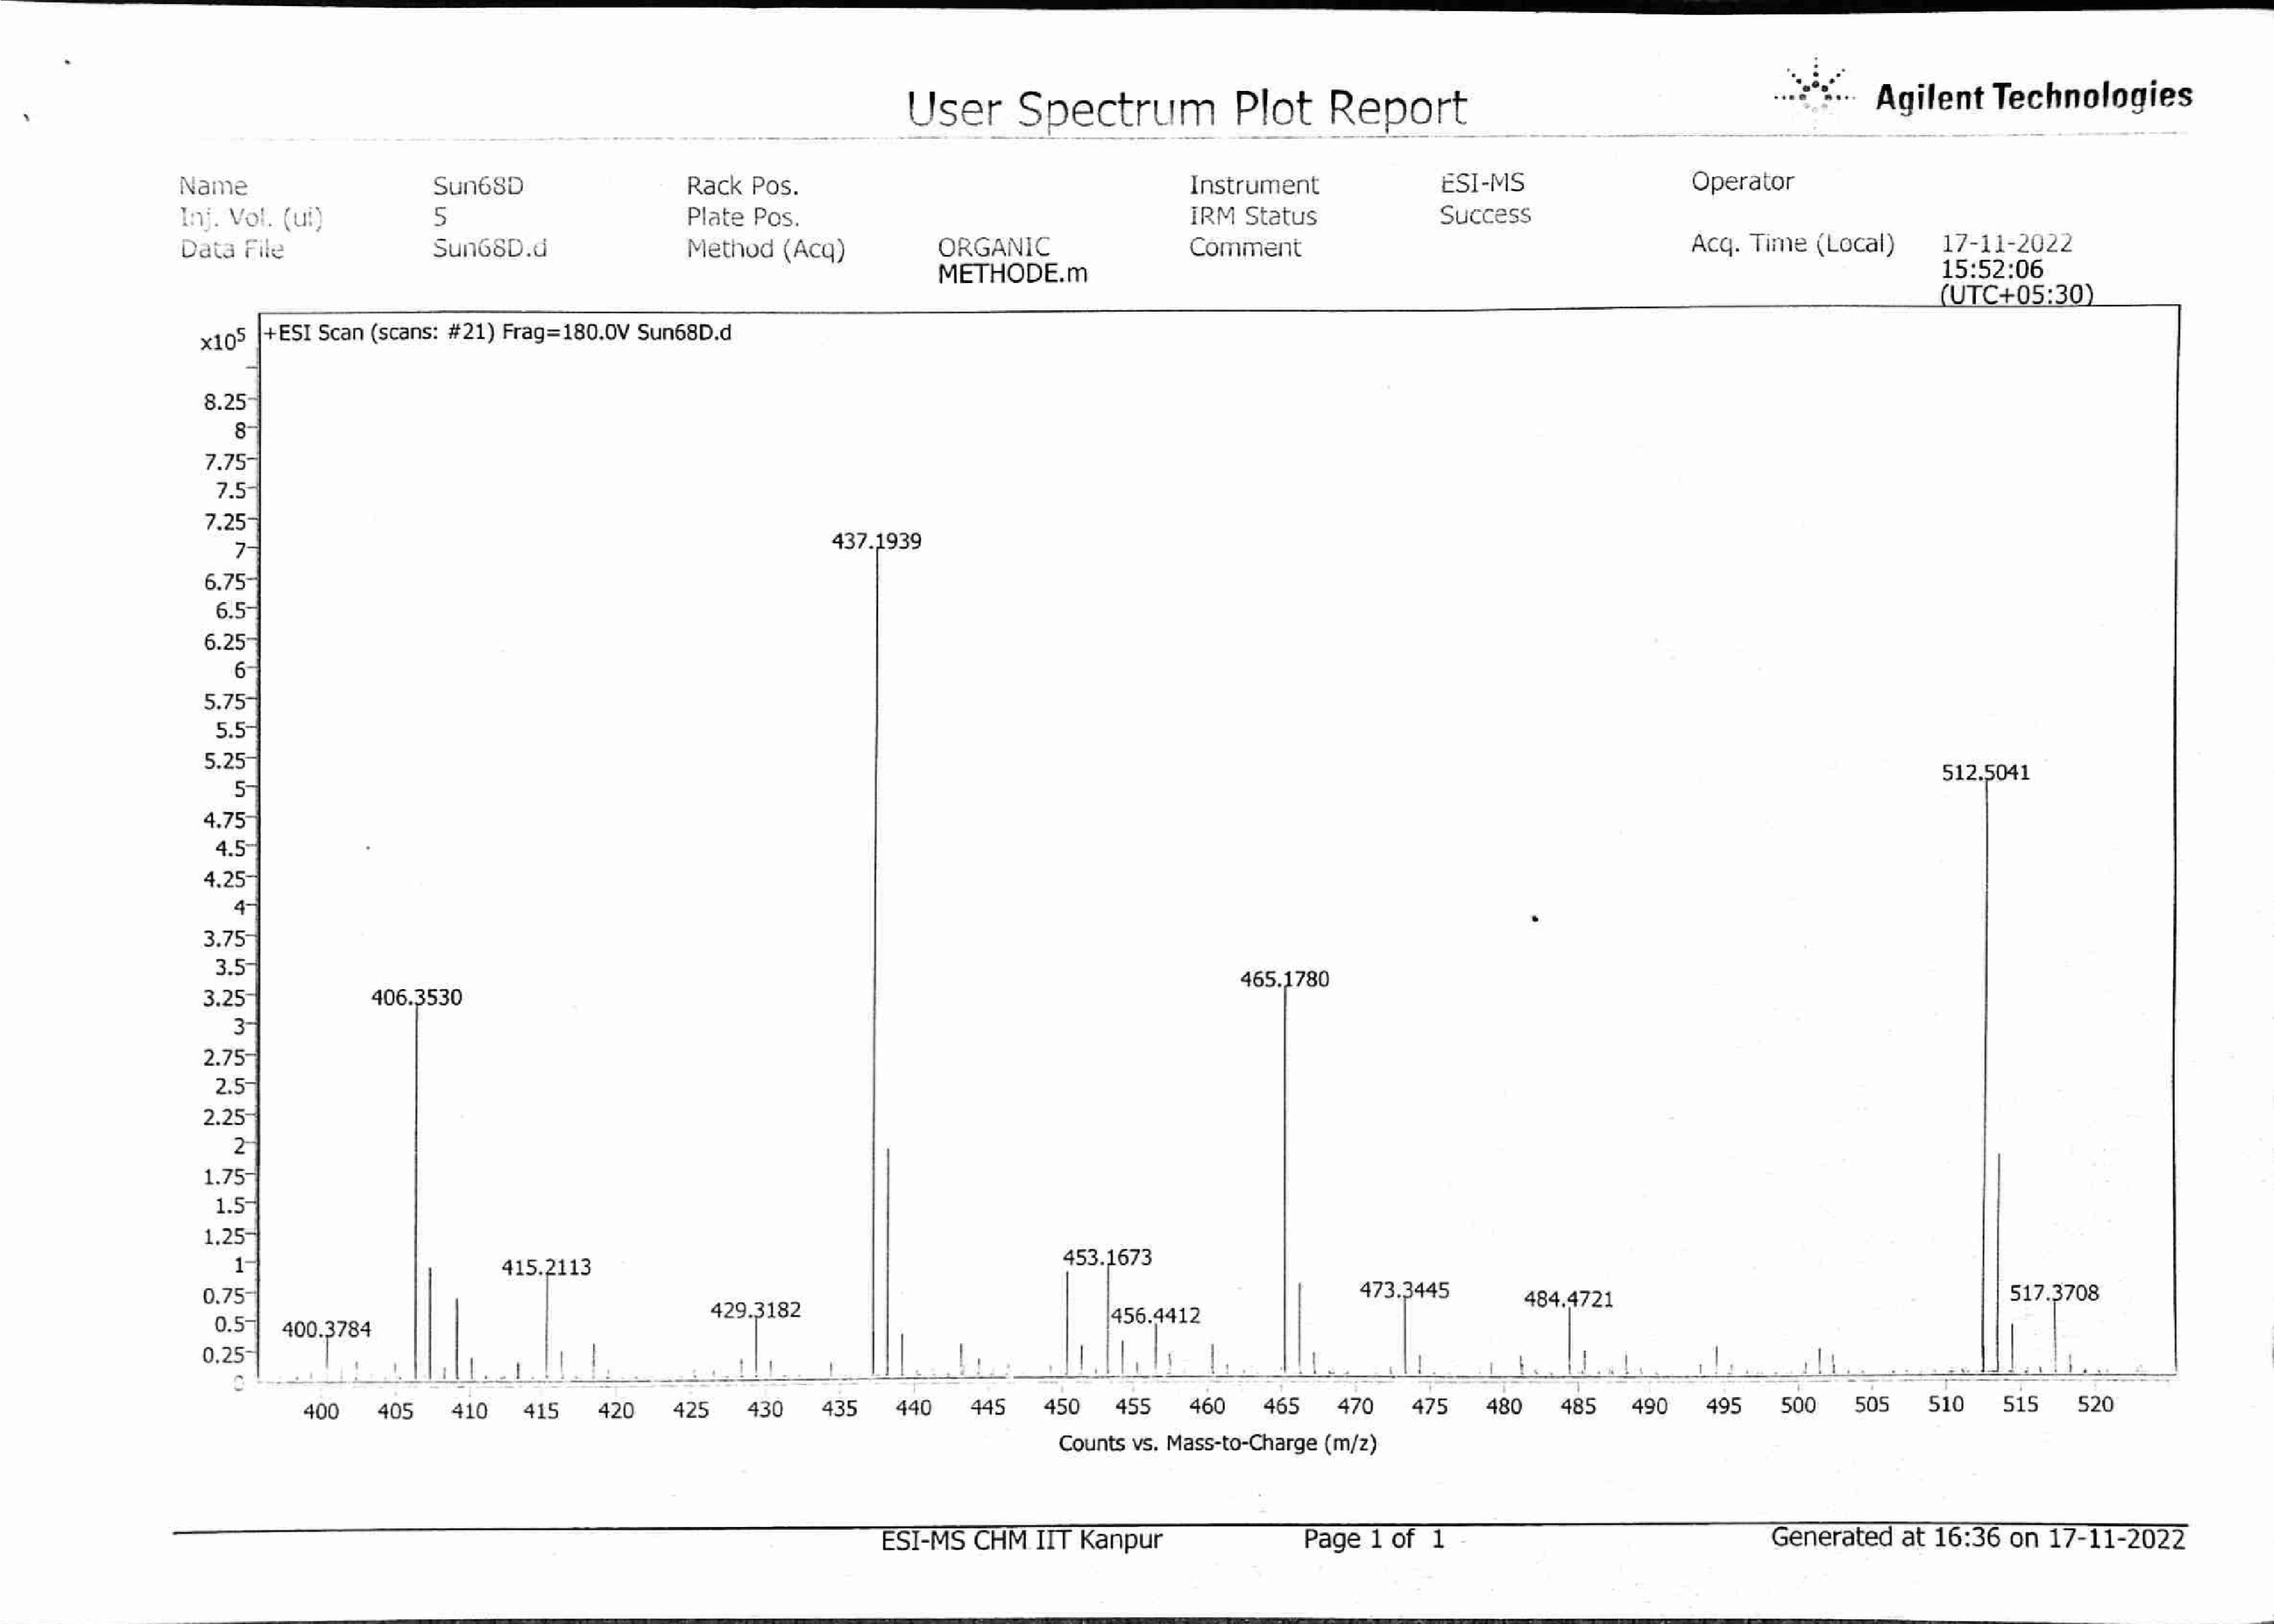


Spectrum 15

***N,N*,3-trimethyl-2-(2-(phenylsulfonamido)propanamido)butanamide (3g)**

Spectrum 16

Spectrum 17


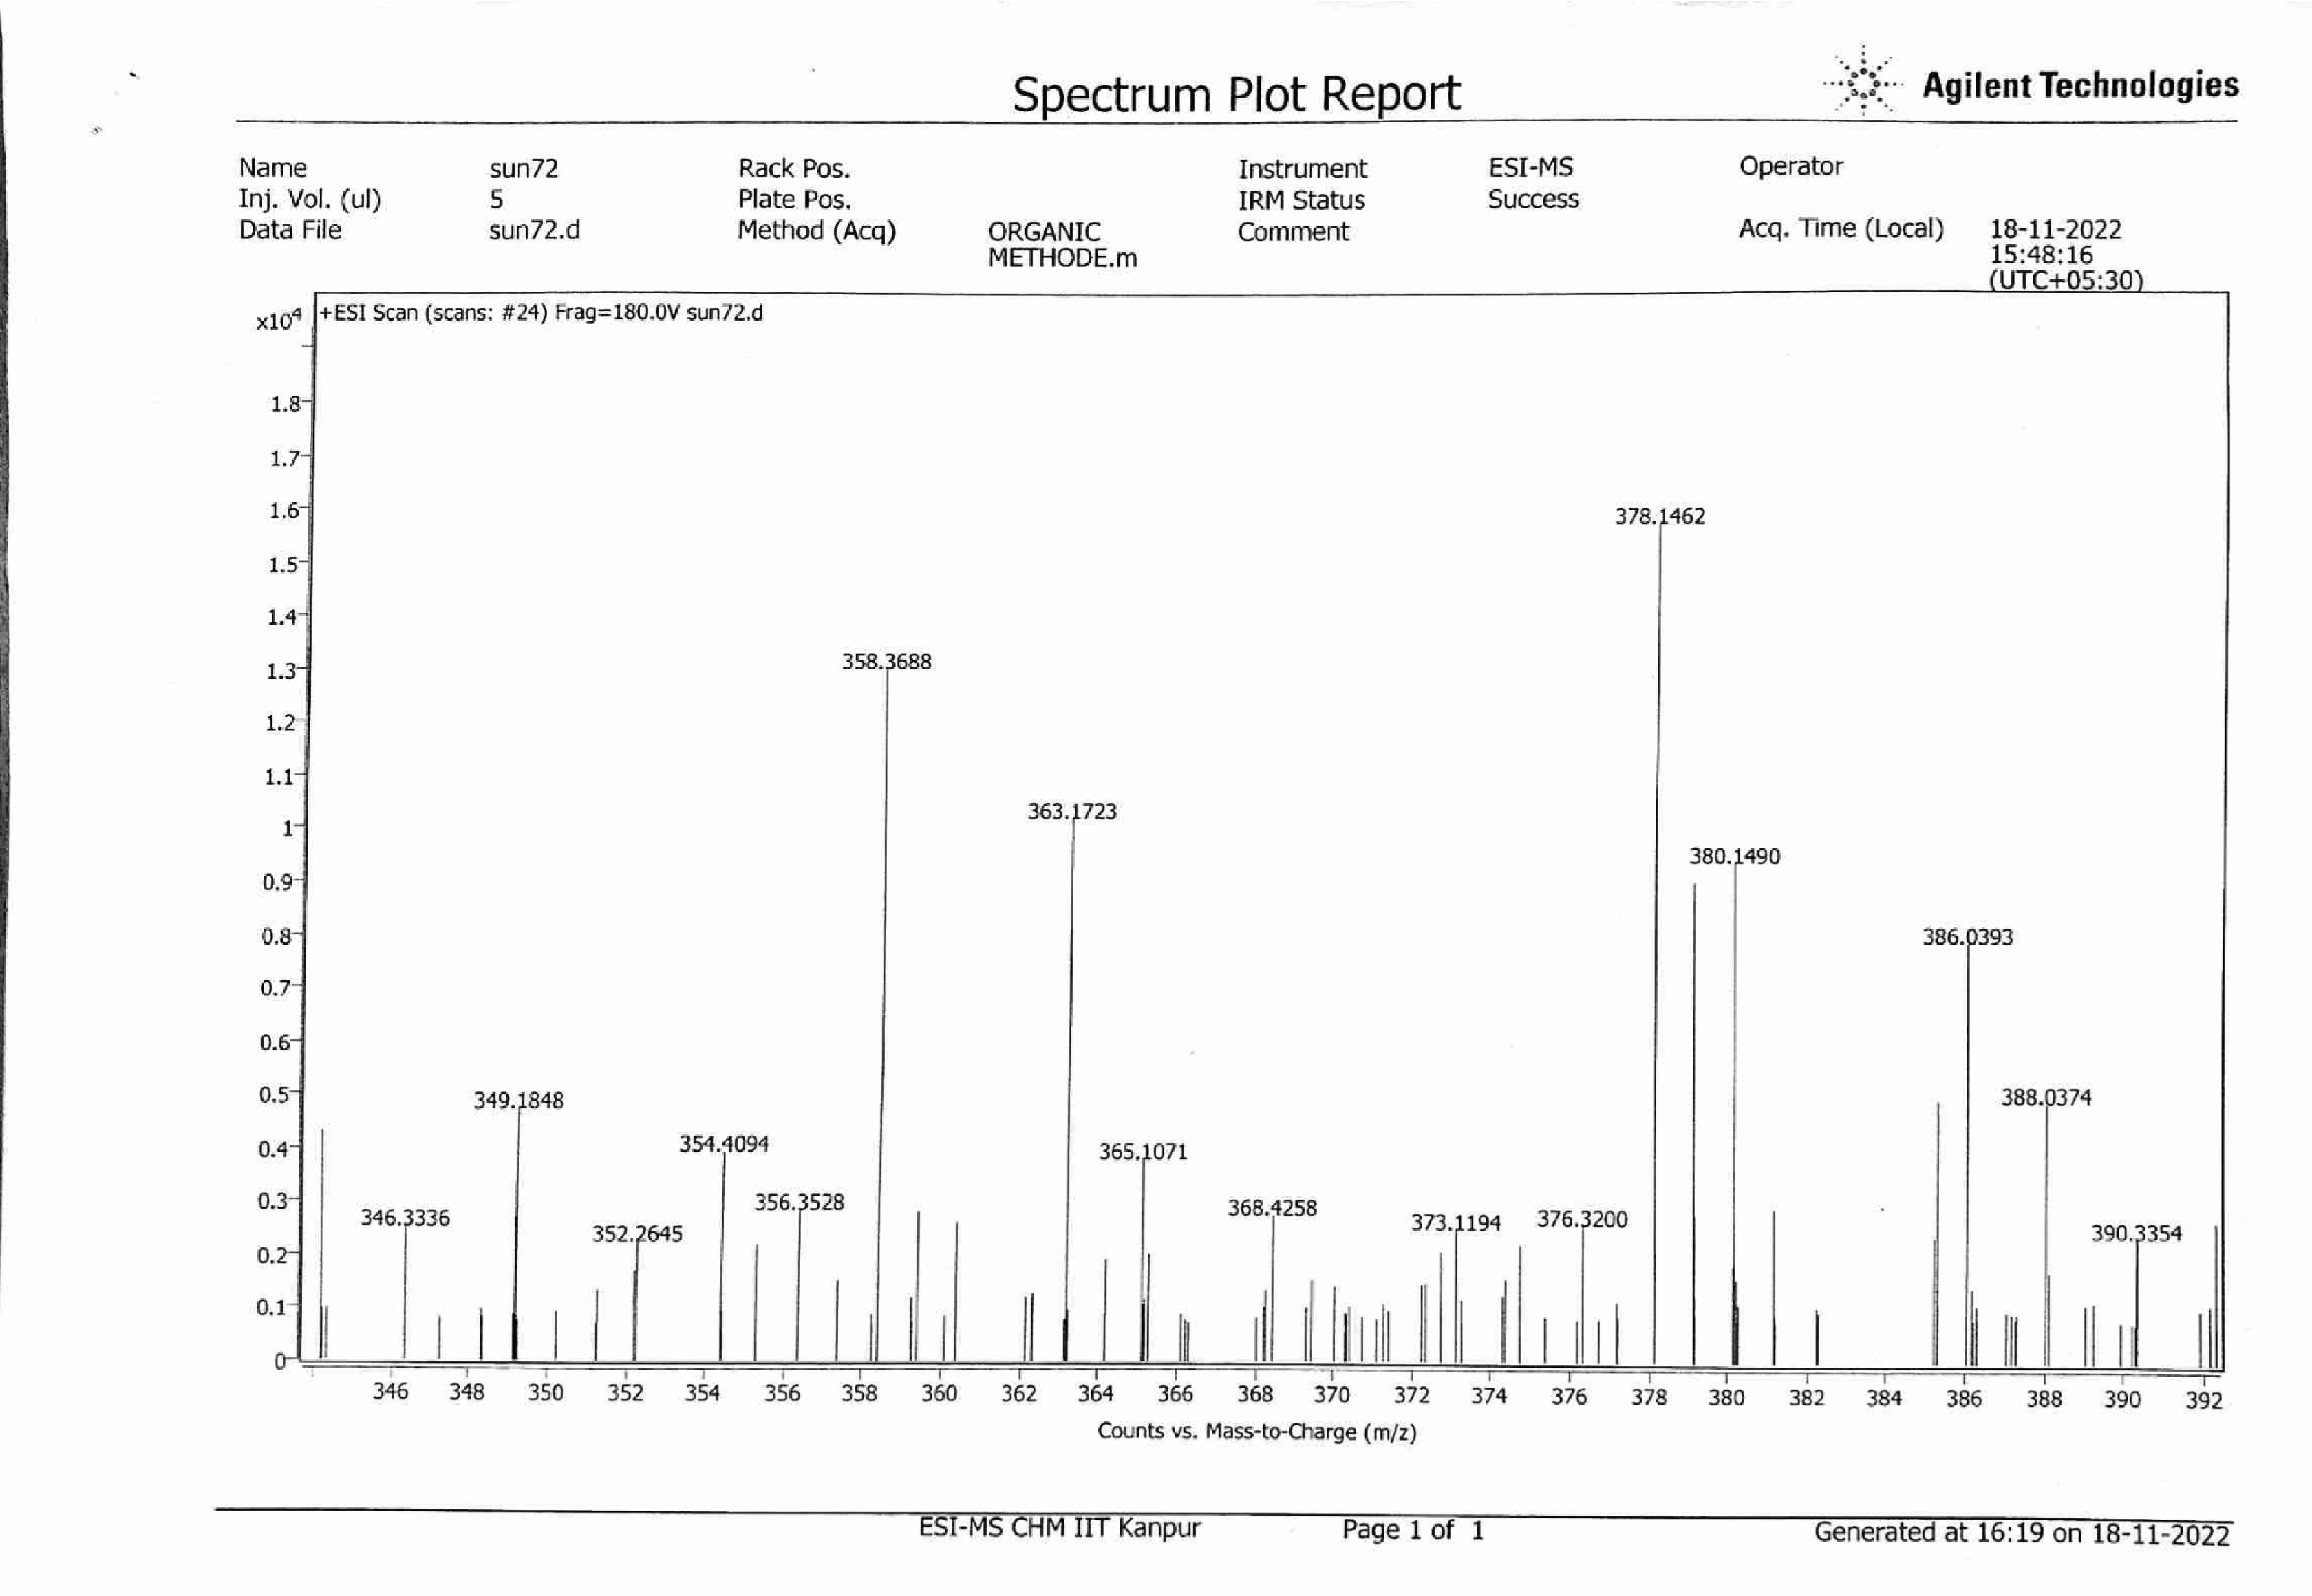


Spectrum 18

***N,N*,3-trimethyl-2-(2-(4-methylphenylsulfonamido)propanamido)butanamide (3h)**

Spectrum 19

Spectrum 20

Spectrum 21

***N,N*,3-trimethyl-2-(2-(4-nitrophenylsulfonamido)propanamido)butanamide (3i)**

Spectrum 22


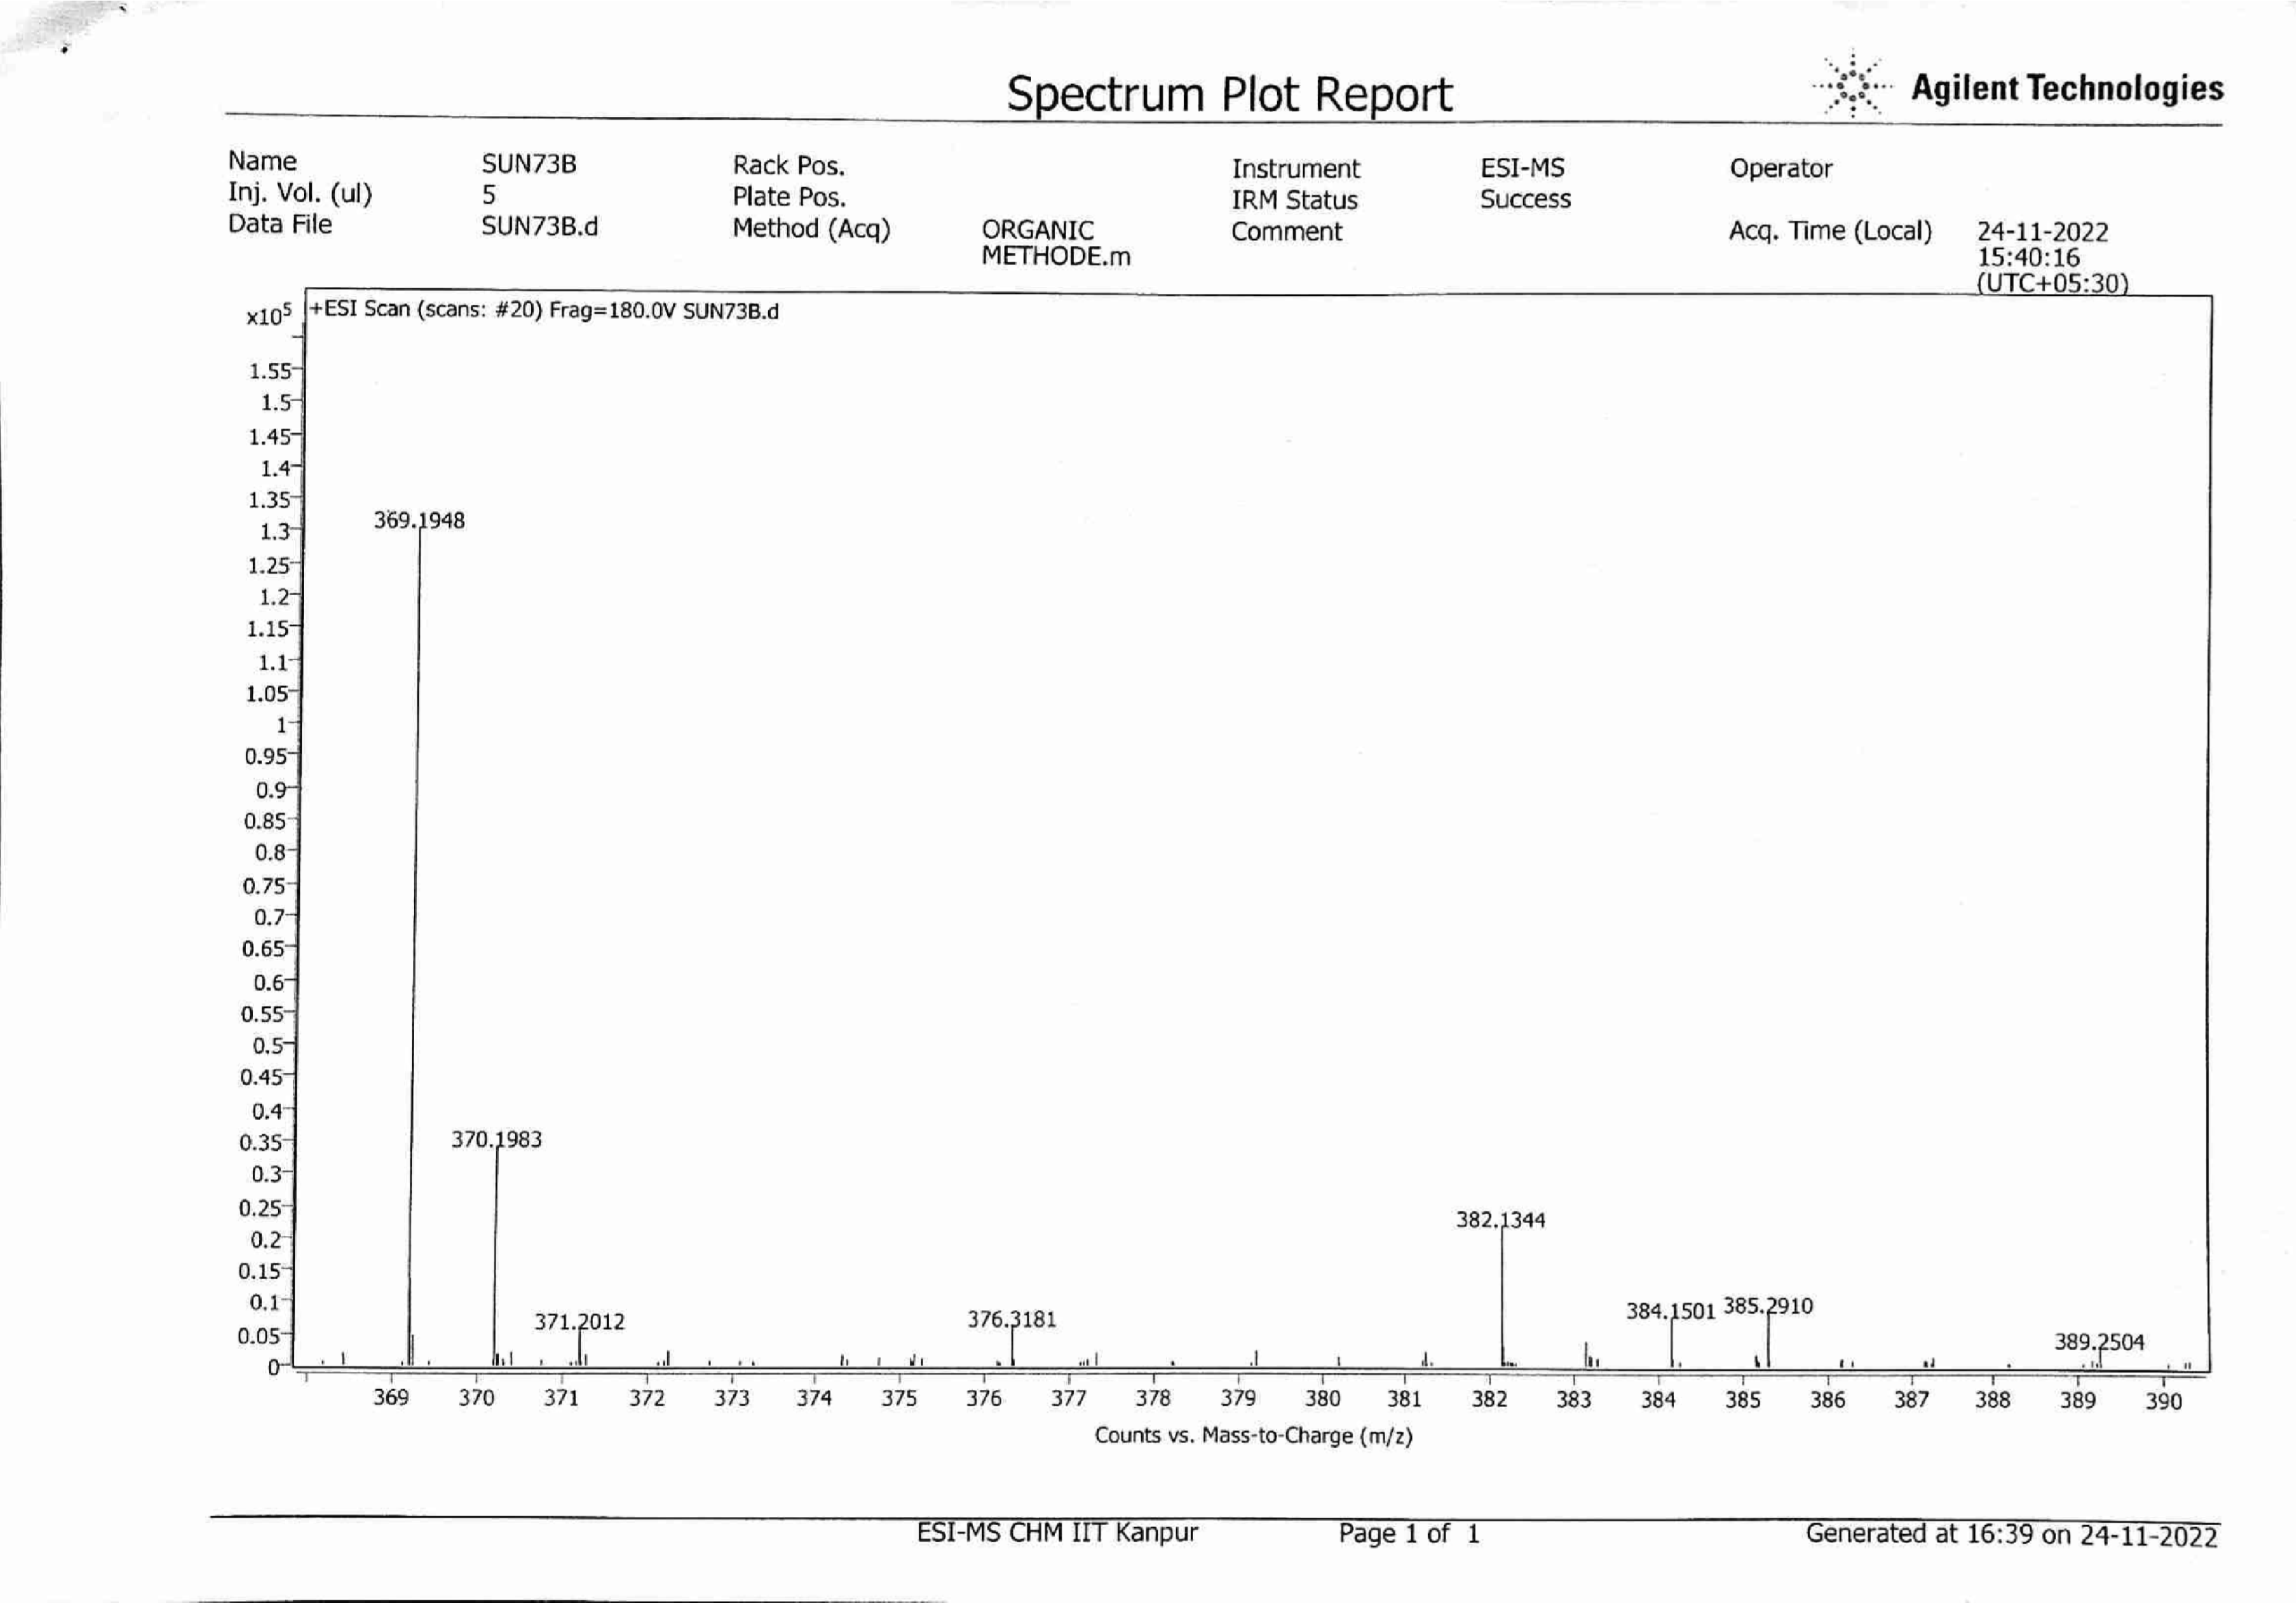
Spectrum 23

***N*-butyl-3-methyl-2-(2-(phenylsulfonamido)propanamido)butanamide (3j)**

Spectrum 24

Spectrum 25


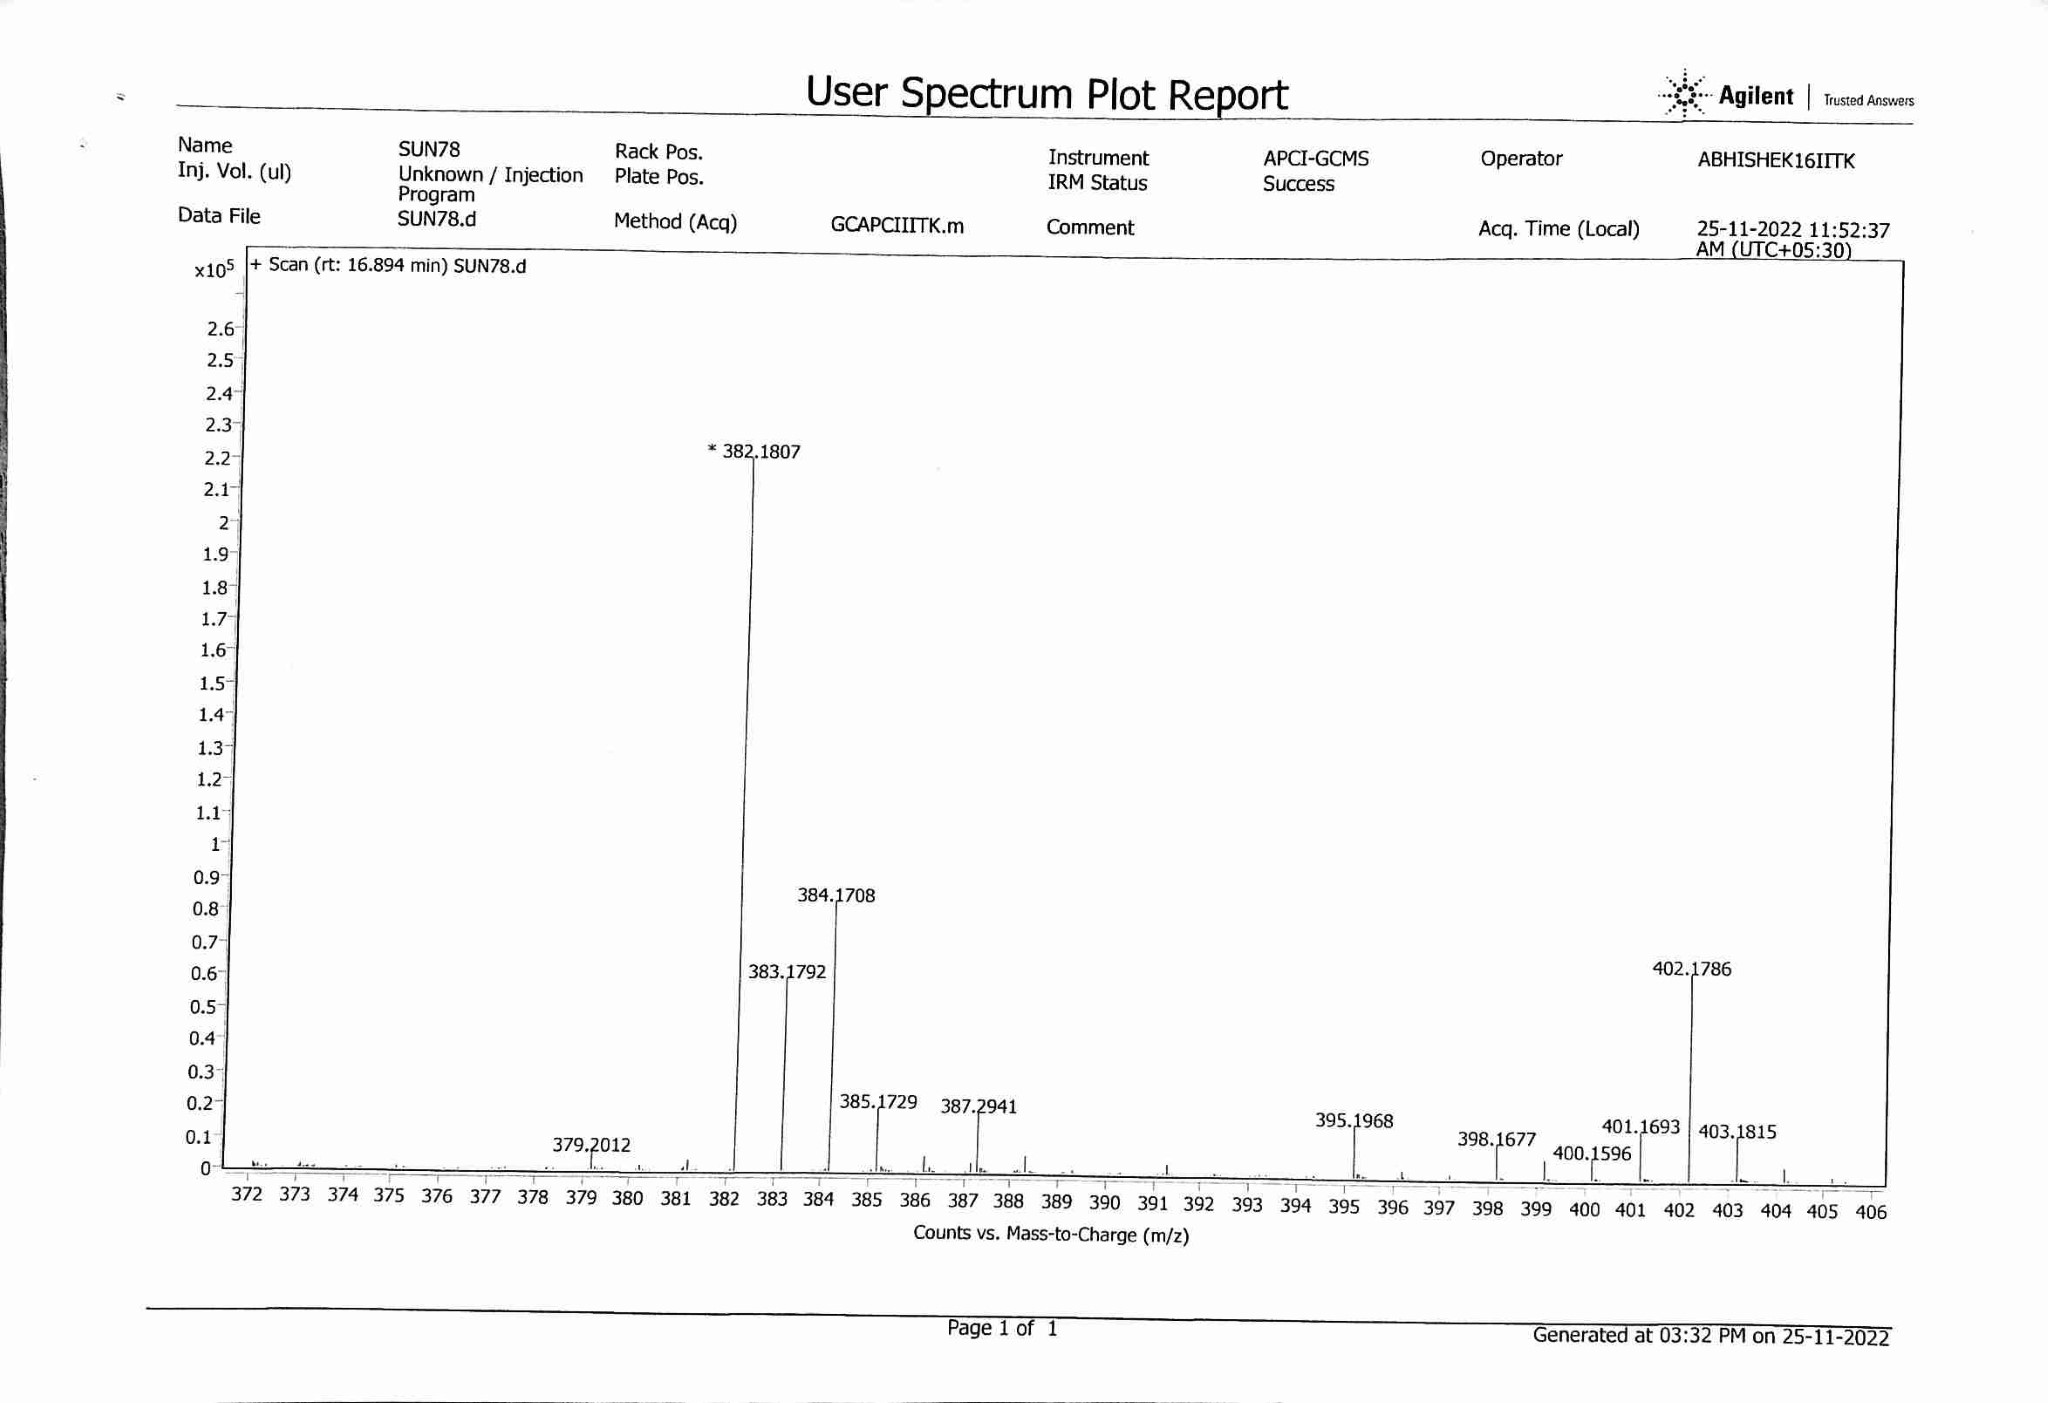
Spectrum 26

***N*-butyl-3-methyl-2-(2-(4-methylphenylsulfonamido)propanamido)butanamide (3k)**

Spectrum 27

Spectrum 28

***N-*butyl-3-methyl-2-(2-(4-nitrophenylsulfonamido)propanamido)butanamide** (3l)

Spectrum 29

Spectrum 30

***N-(*3-methyl-1-oxo-1-(piperidin-1-yl)butan-2-yl)-2-(phenylsulfonamido)propanamide (3m)**

Spectrum 31

Spectrum 32

Spectrum 33


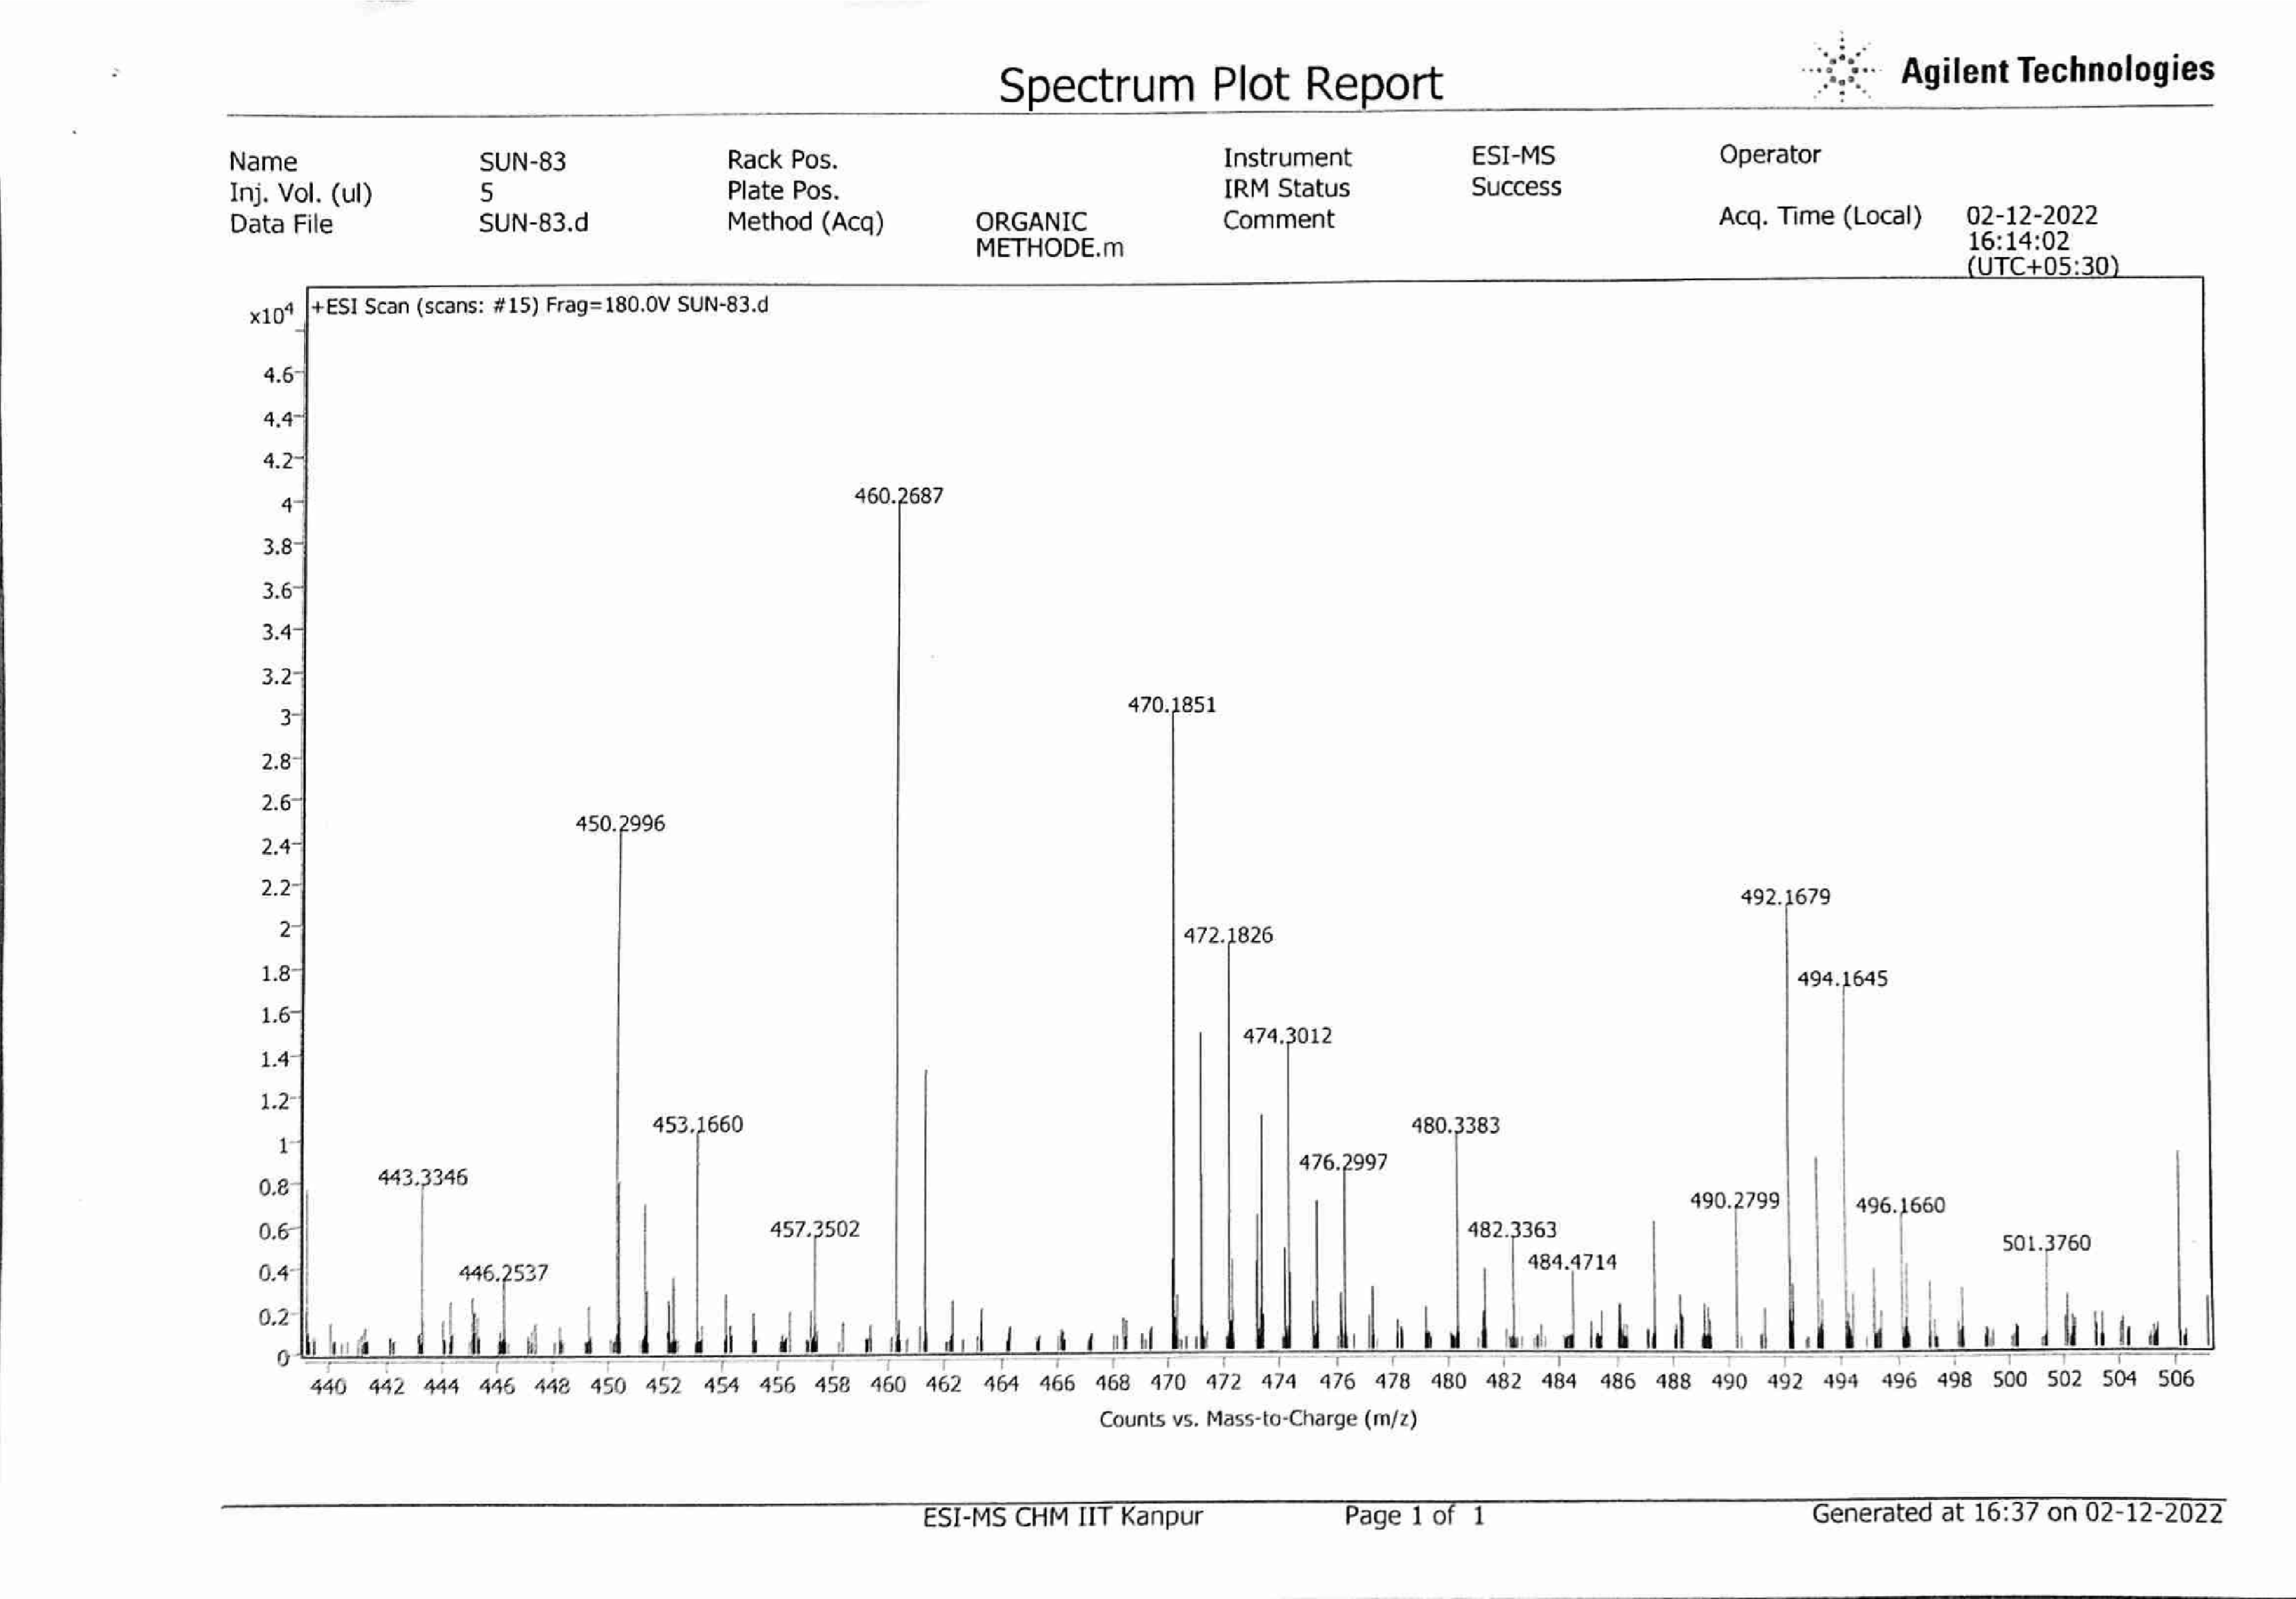


***N*-(3-methyl-1-oxo-1-(piperidin-1-yl)butan-2-yl)-2-(4-nitrophenylsulfonamido)**

**propanamide (3n)**

Spectrum 33

Spectrum 34

***N*-(3-methyl-1-oxo-1-(1H-pyrazol-1-yl)butan-2-yl)-2-(phenylsulfonamido)propanamide (3o)**

Spectrum 35

Spectrum 36

***N-*(3-methyl-1-oxo-1-(*1H*-pyrazol-1-yl)butan-2-yl)-2-(4-methylphenylsulfonamido)**

**Propanamide (3p)**

Spectrum 37

Spectrum 38

***N-(*3-methyl-1-oxo-1-(1H-pyrazol-1-yl)butan-2-yl)-2-(4-nitrophenylsulfonamido) propanamide (3q)**

Spectrum 39

Spectrum 40

***N*-(3-methyl-1-oxo-1-(pyrrolidin-1-yl)butan-2-yl)-2-(phenylsulfonamido)propanamide (3r)**

Spectrum 41

Spectrum 42

Spectrum 43


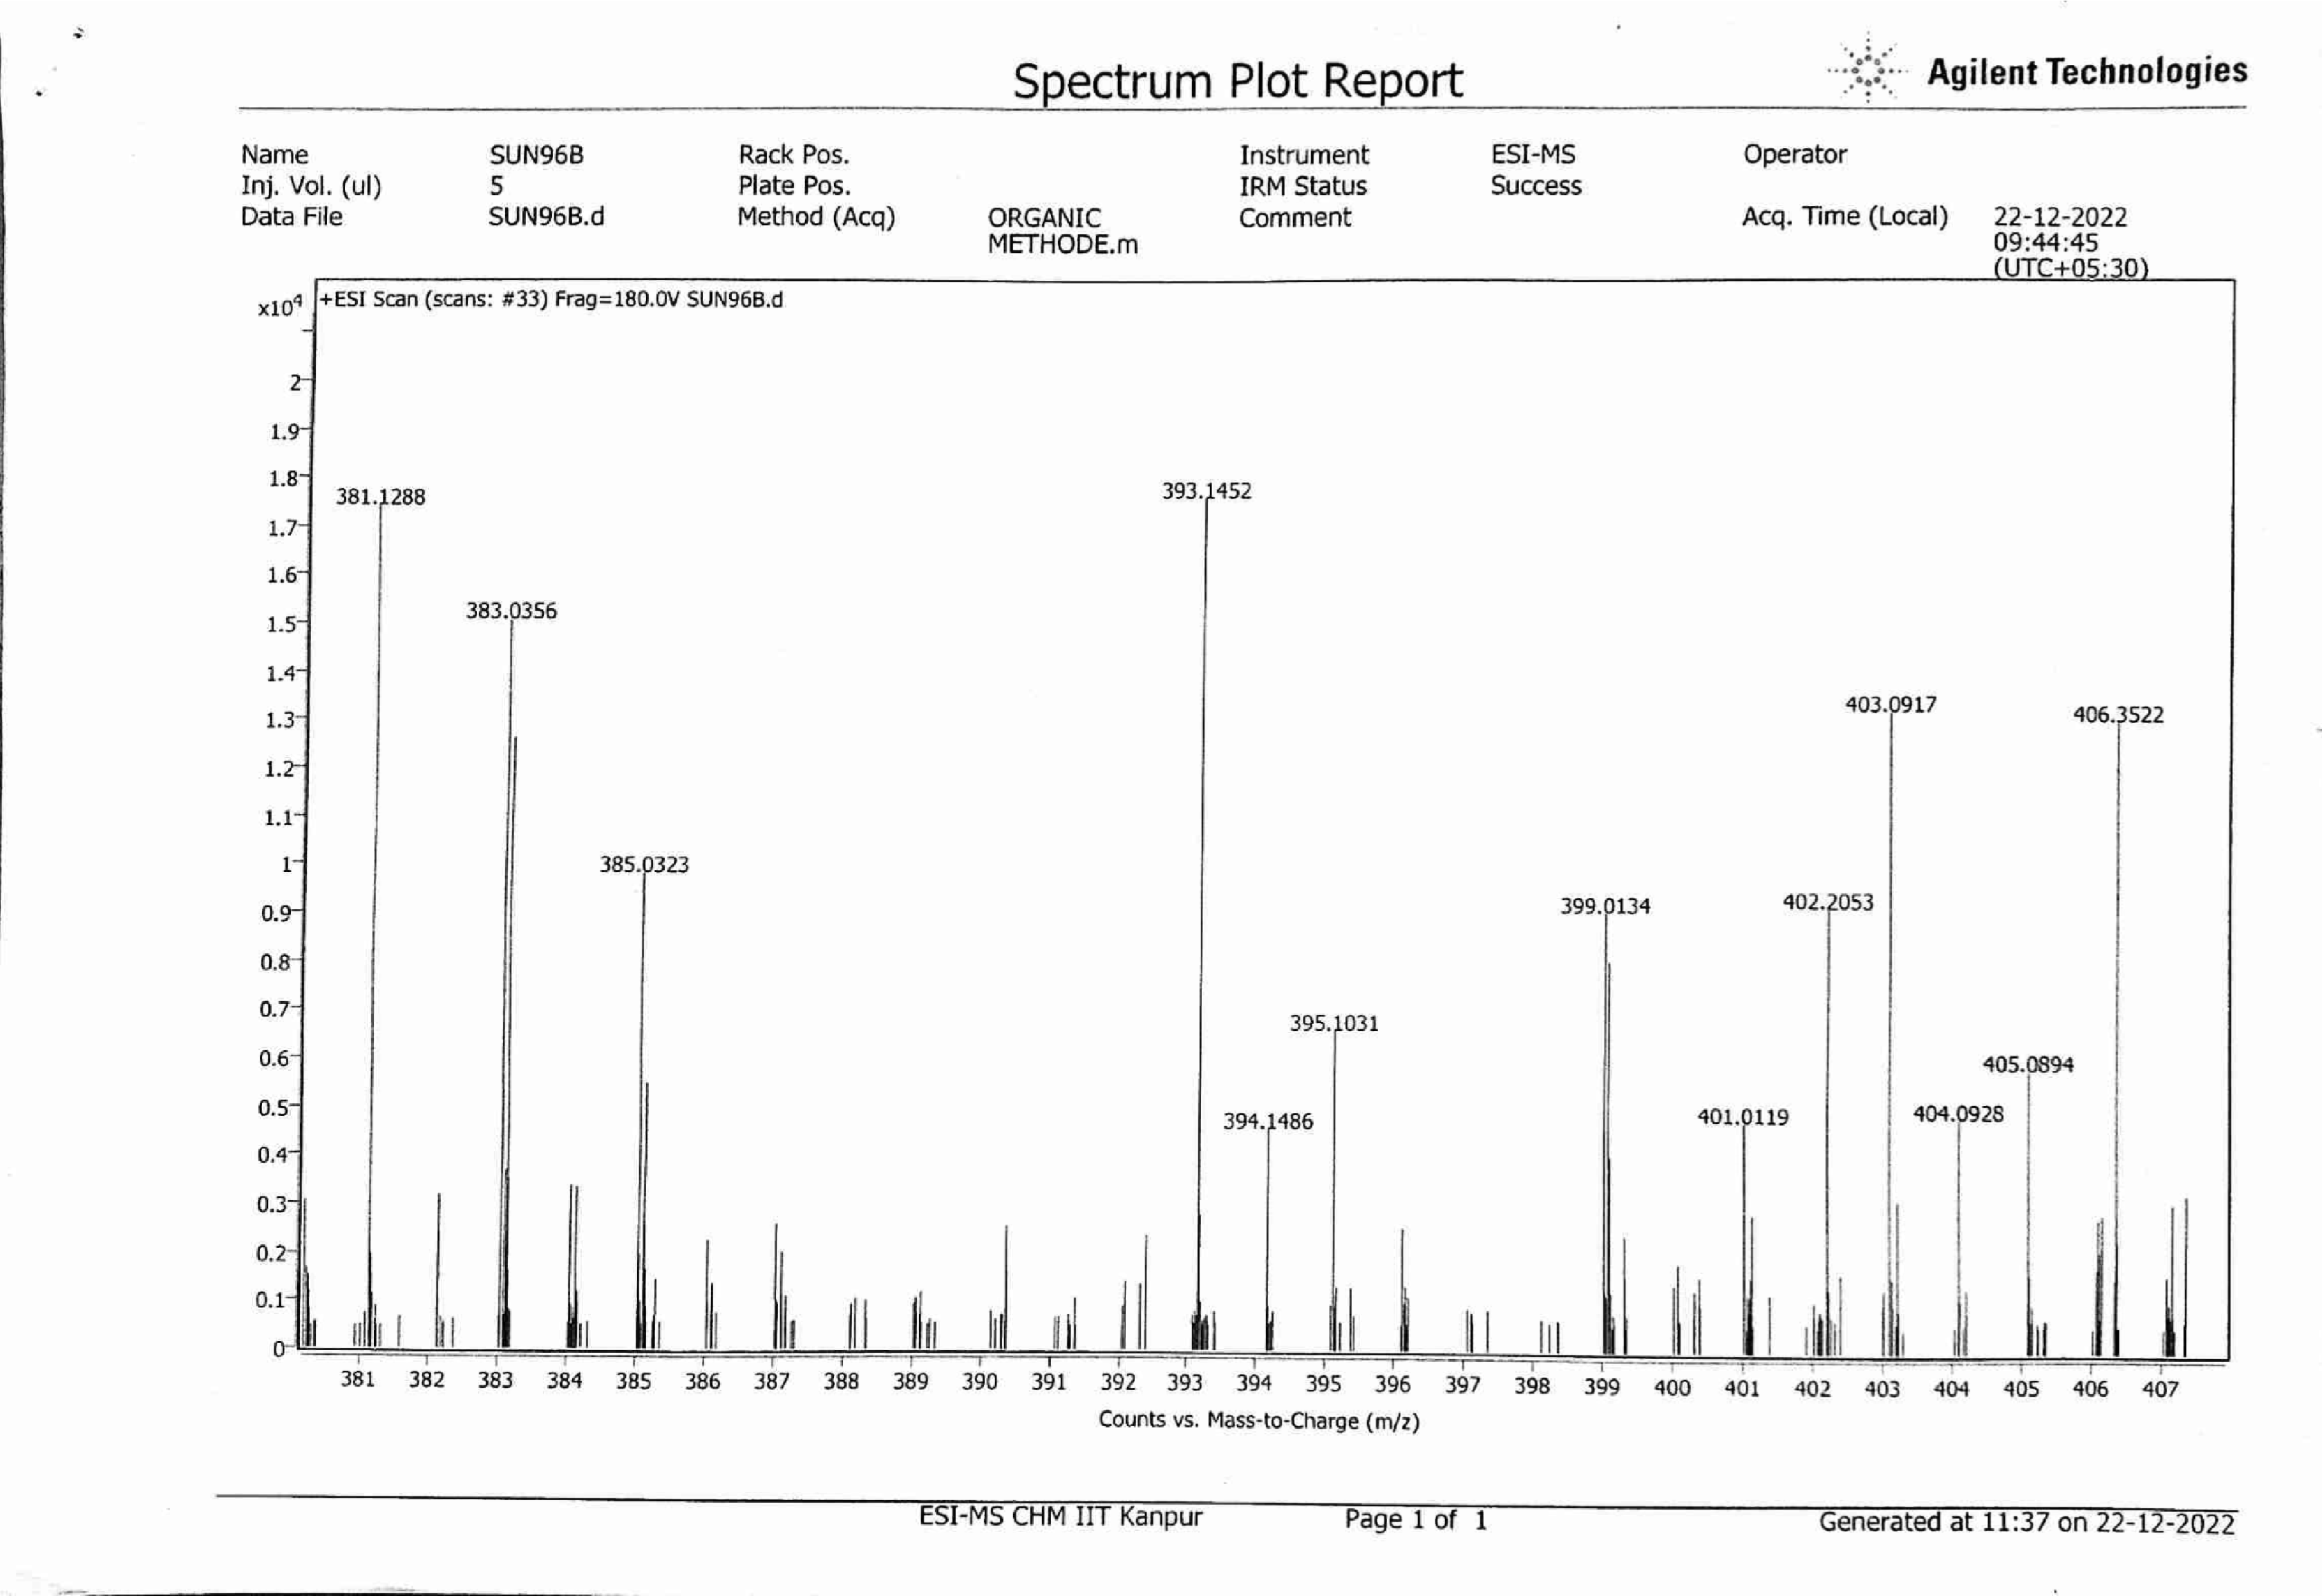


***N-*(3-methyl-1-oxo-1-(pyrrolidin-1-yl)butan-2-yl)-2-(4-methylphenylsulfonamido)**

**Propanamide (3s)**

Spectrum 44

Spectrum 45

Spectrum 46
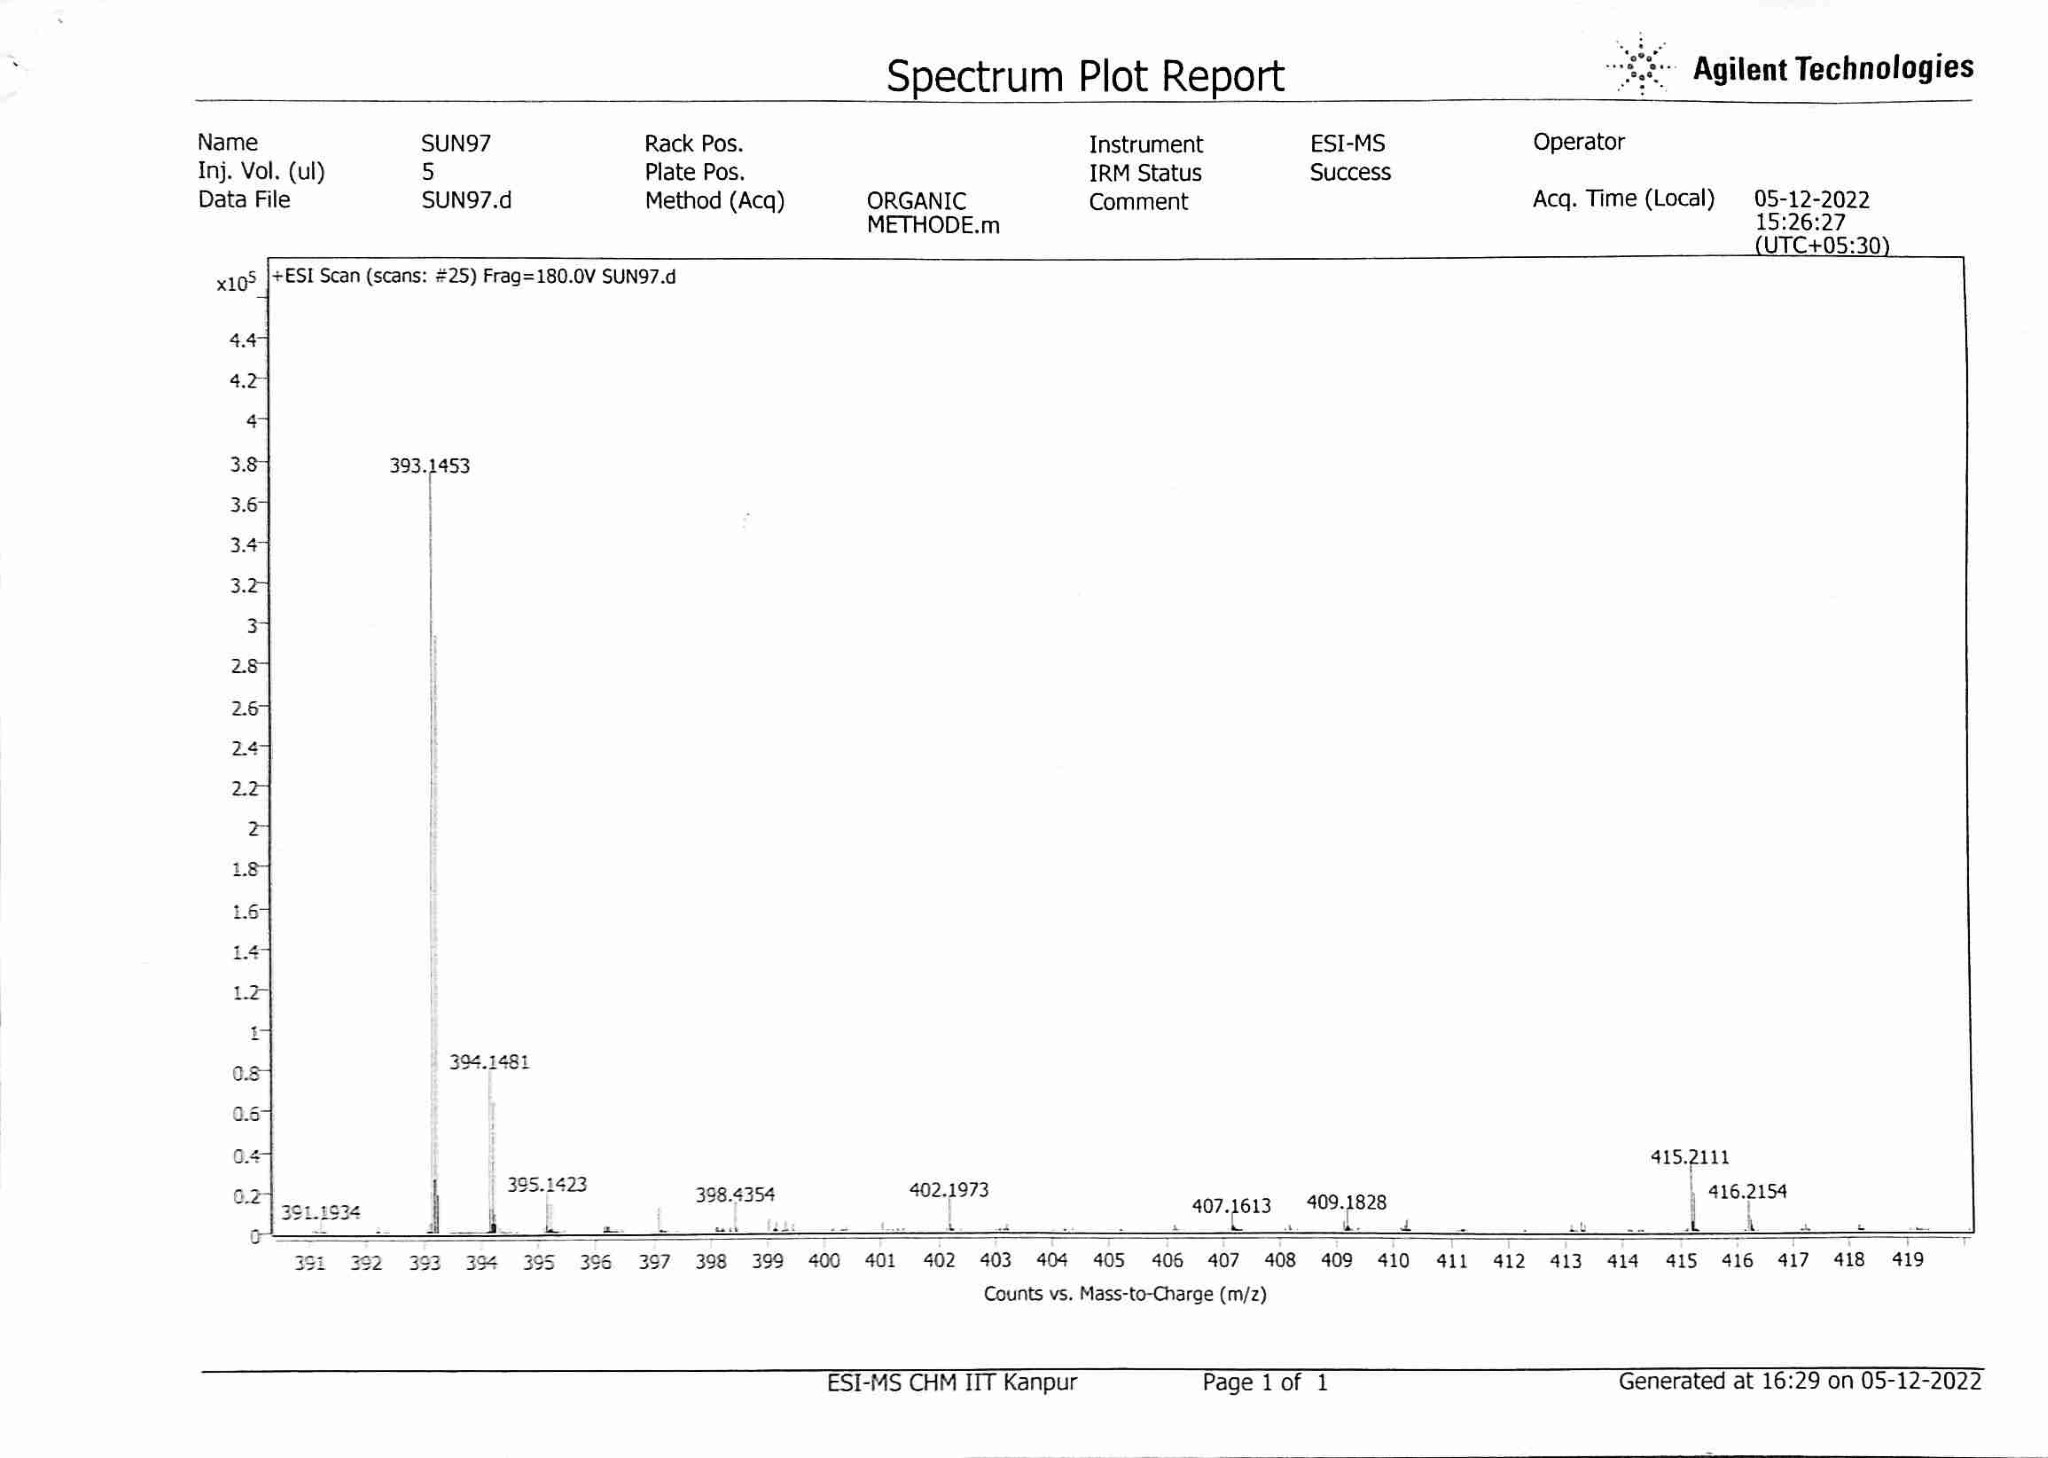


***N*-(3-methyl-1-oxo-1-(pyrrolidin-1-yl)butan-2-yl)-2-(4-nitrophenylsulfonamido)**

**Propanamide (3t)**

Spectrum 47

Spectrum 48

***N,N*-diethyl-3-methyl-2-(2-(phenylsulfonamido)propanamido)butanamide (3u)**

Spectrum 49

Spectrum 50

Spectrum 51


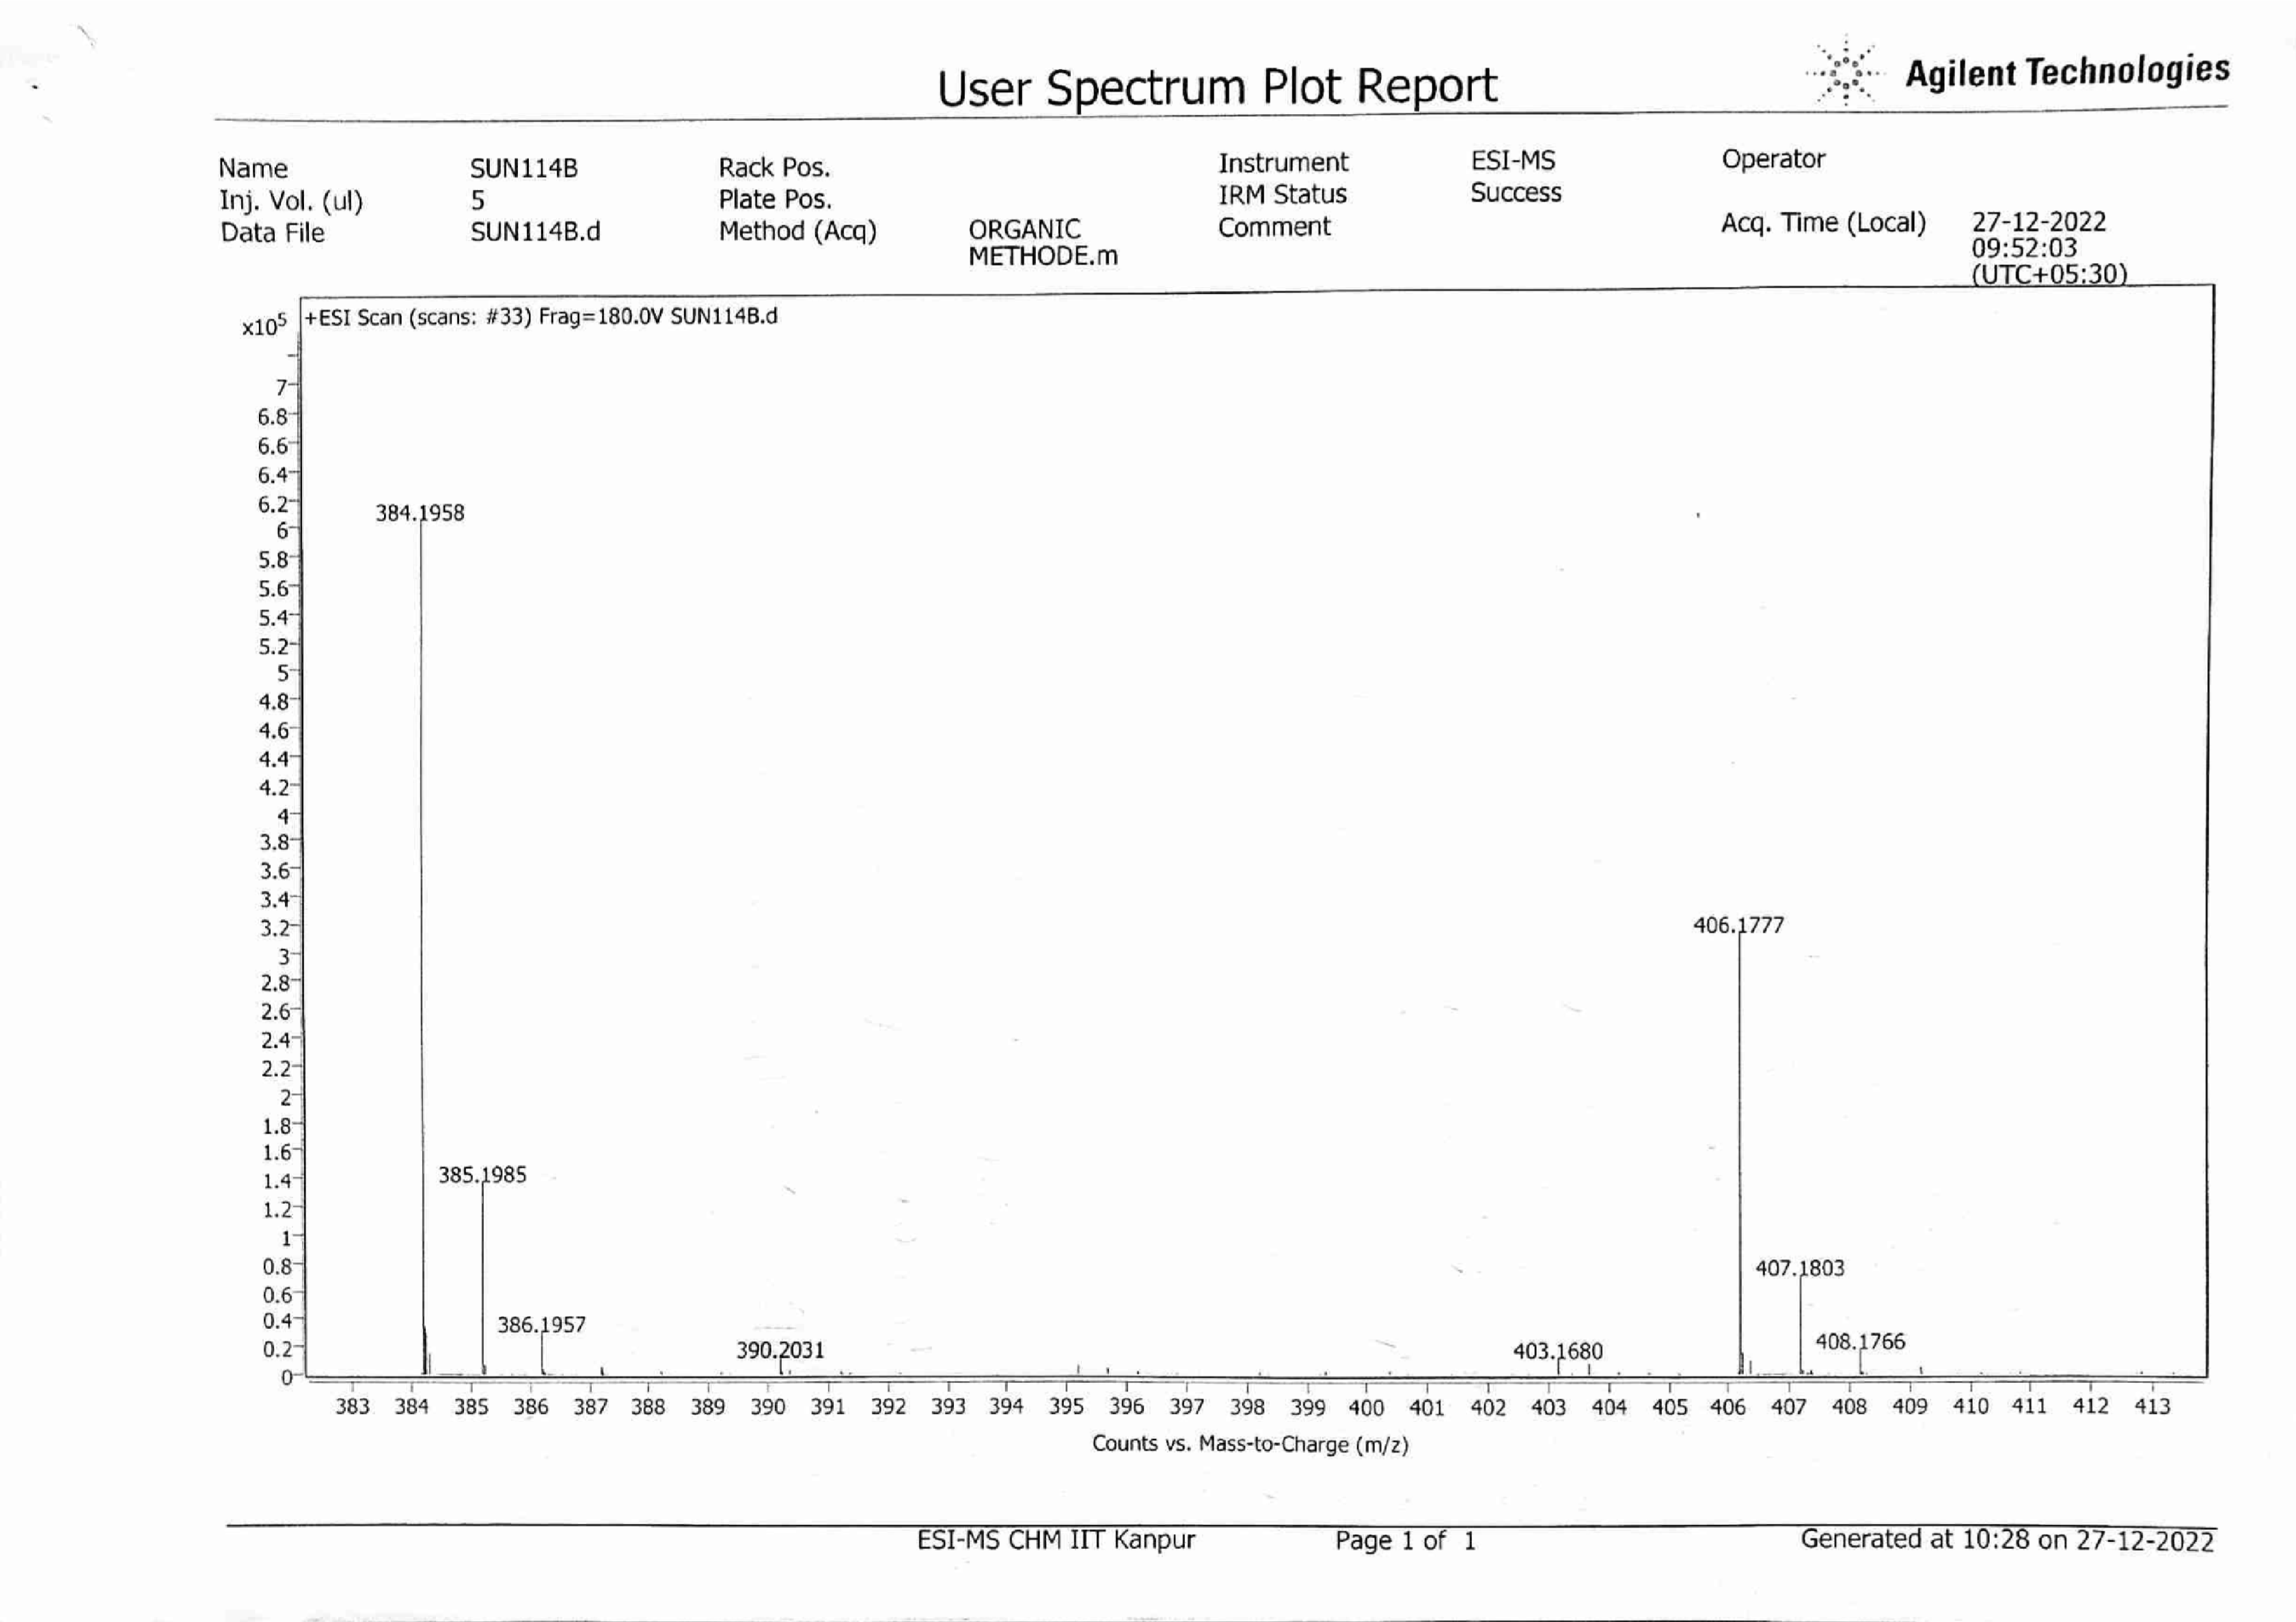


***N,N*-diethyl-3-methyl-2-(2-(4-methylphenylsulfonamido)propanamido)butanamide (3v)**

Spectrum 52

Spectrum 53

Spectrum 54


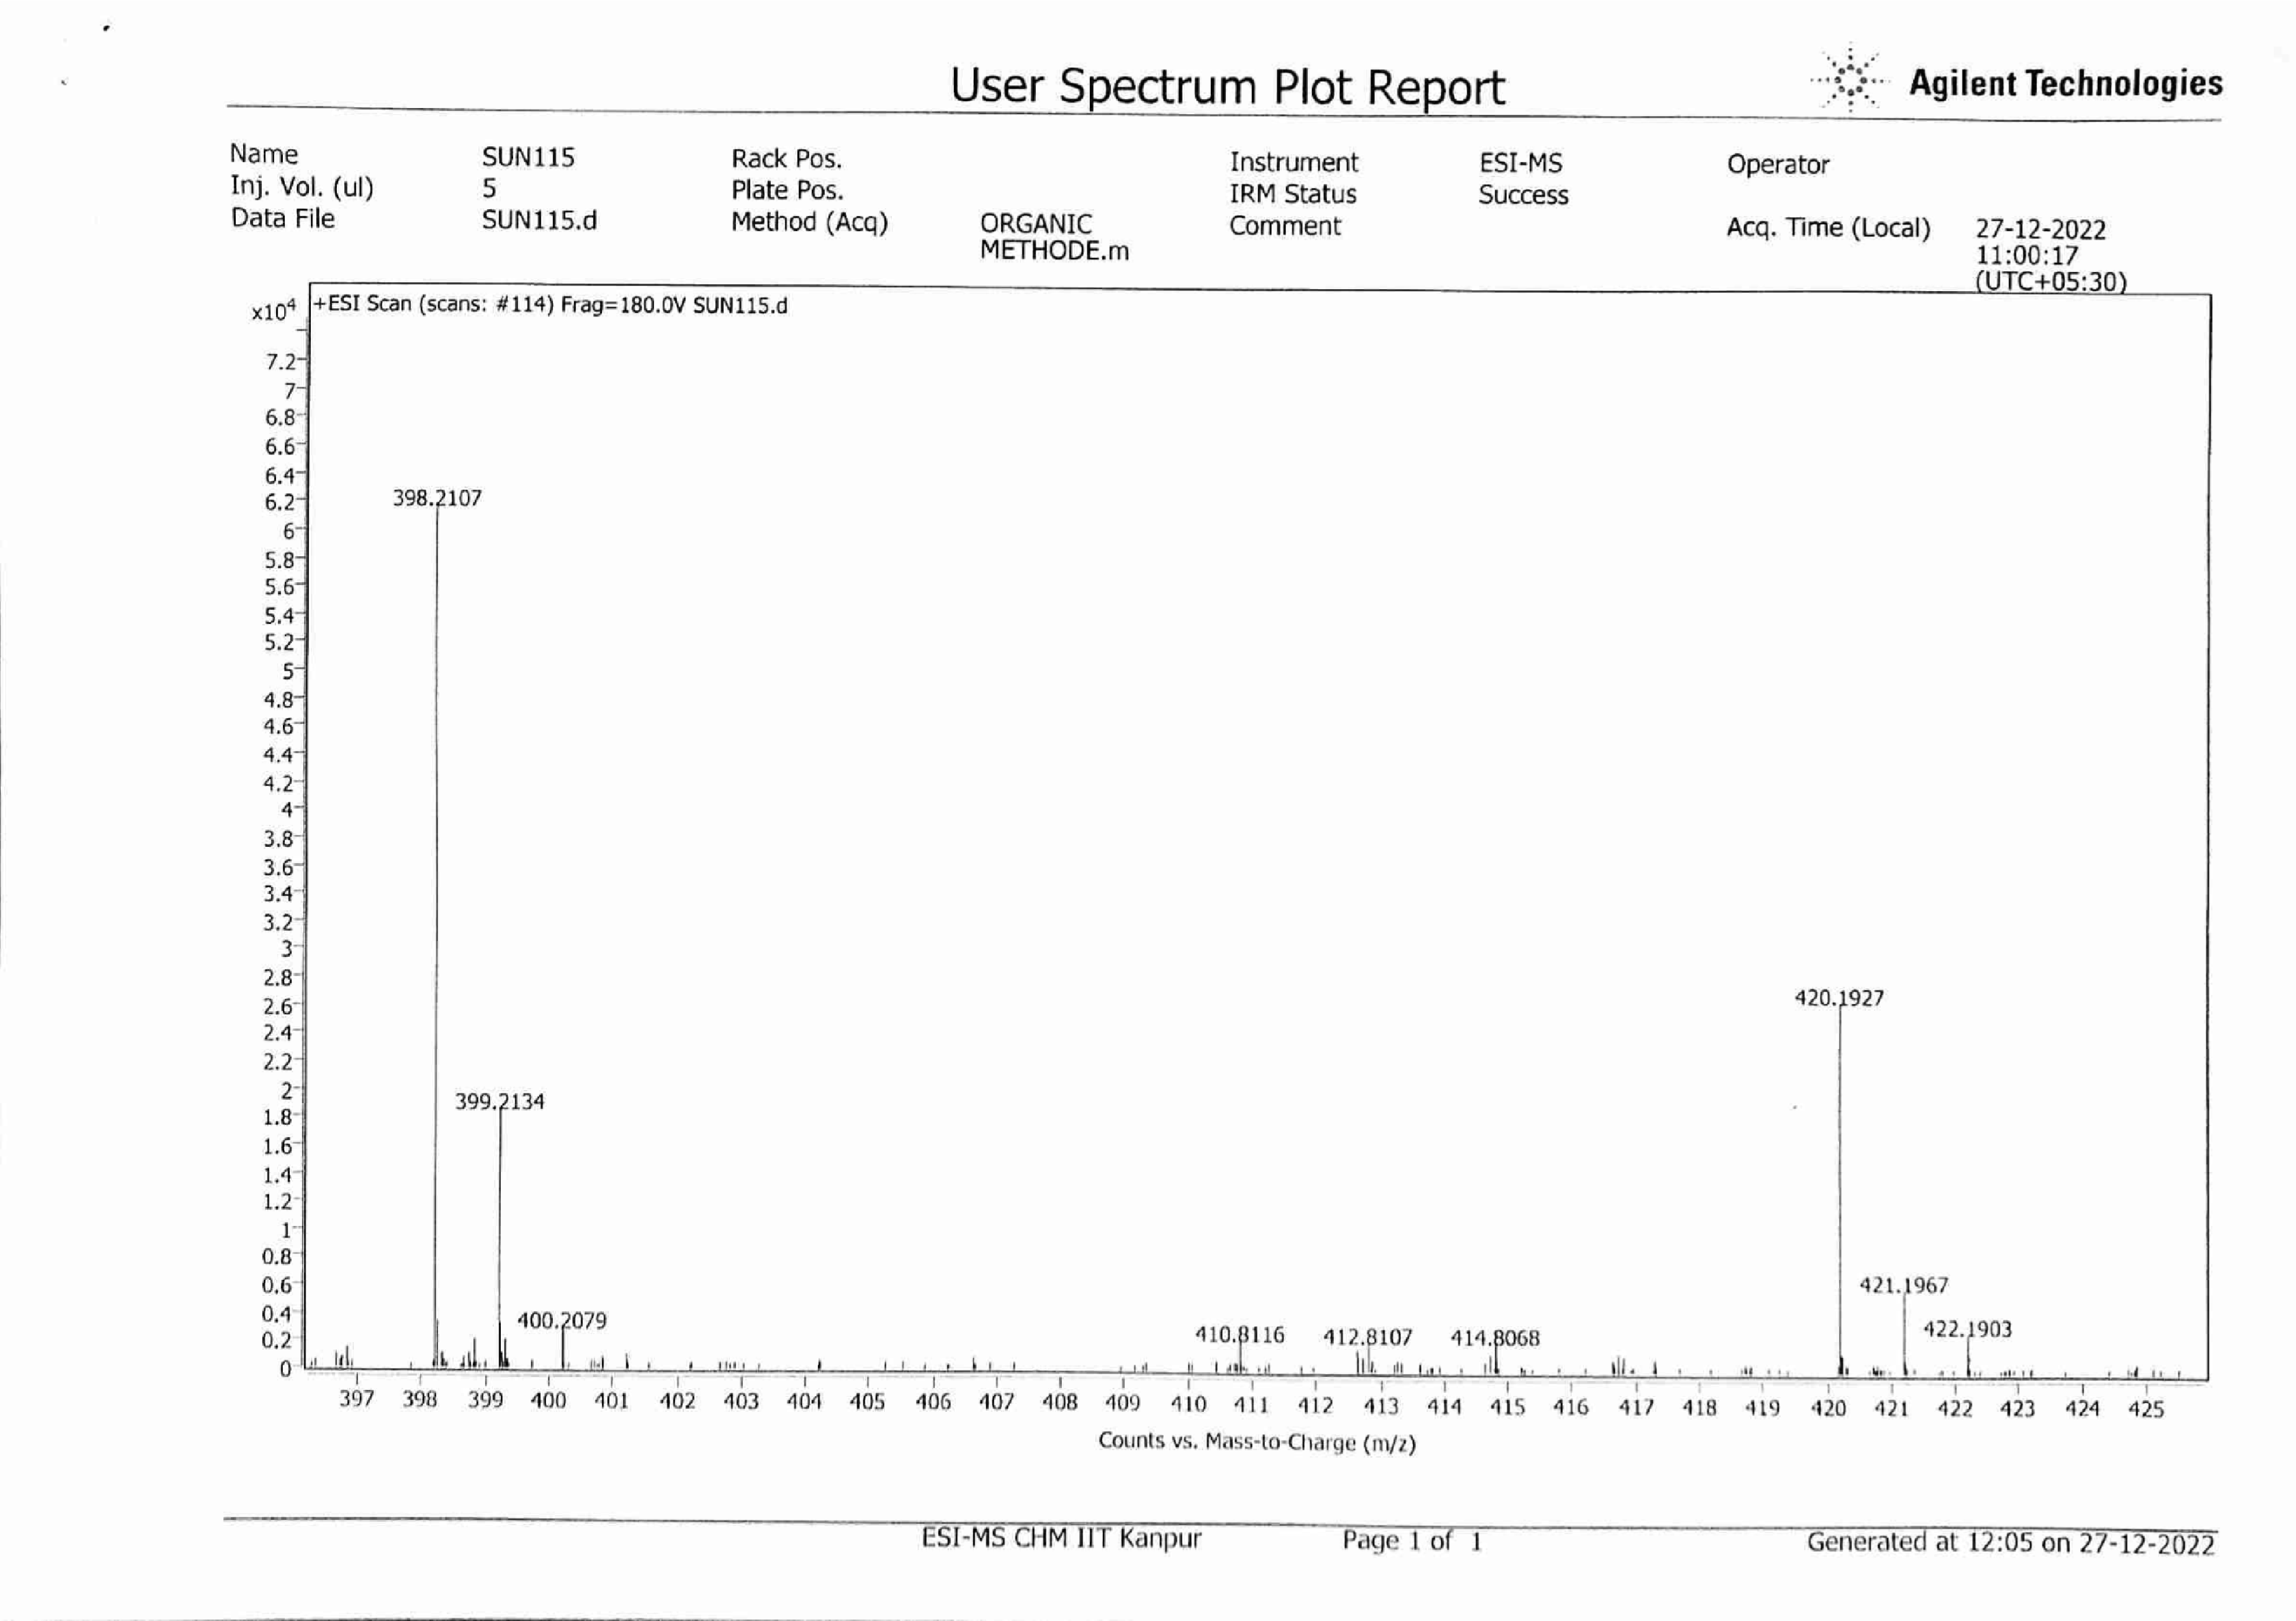


***N,N*-diethyl-3-methyl-2-(2-(4-nitrophenylsulfonamido)propanamido)butanamide (3w)**

Spectrum 55

Spectrum 56

Spectrum 57


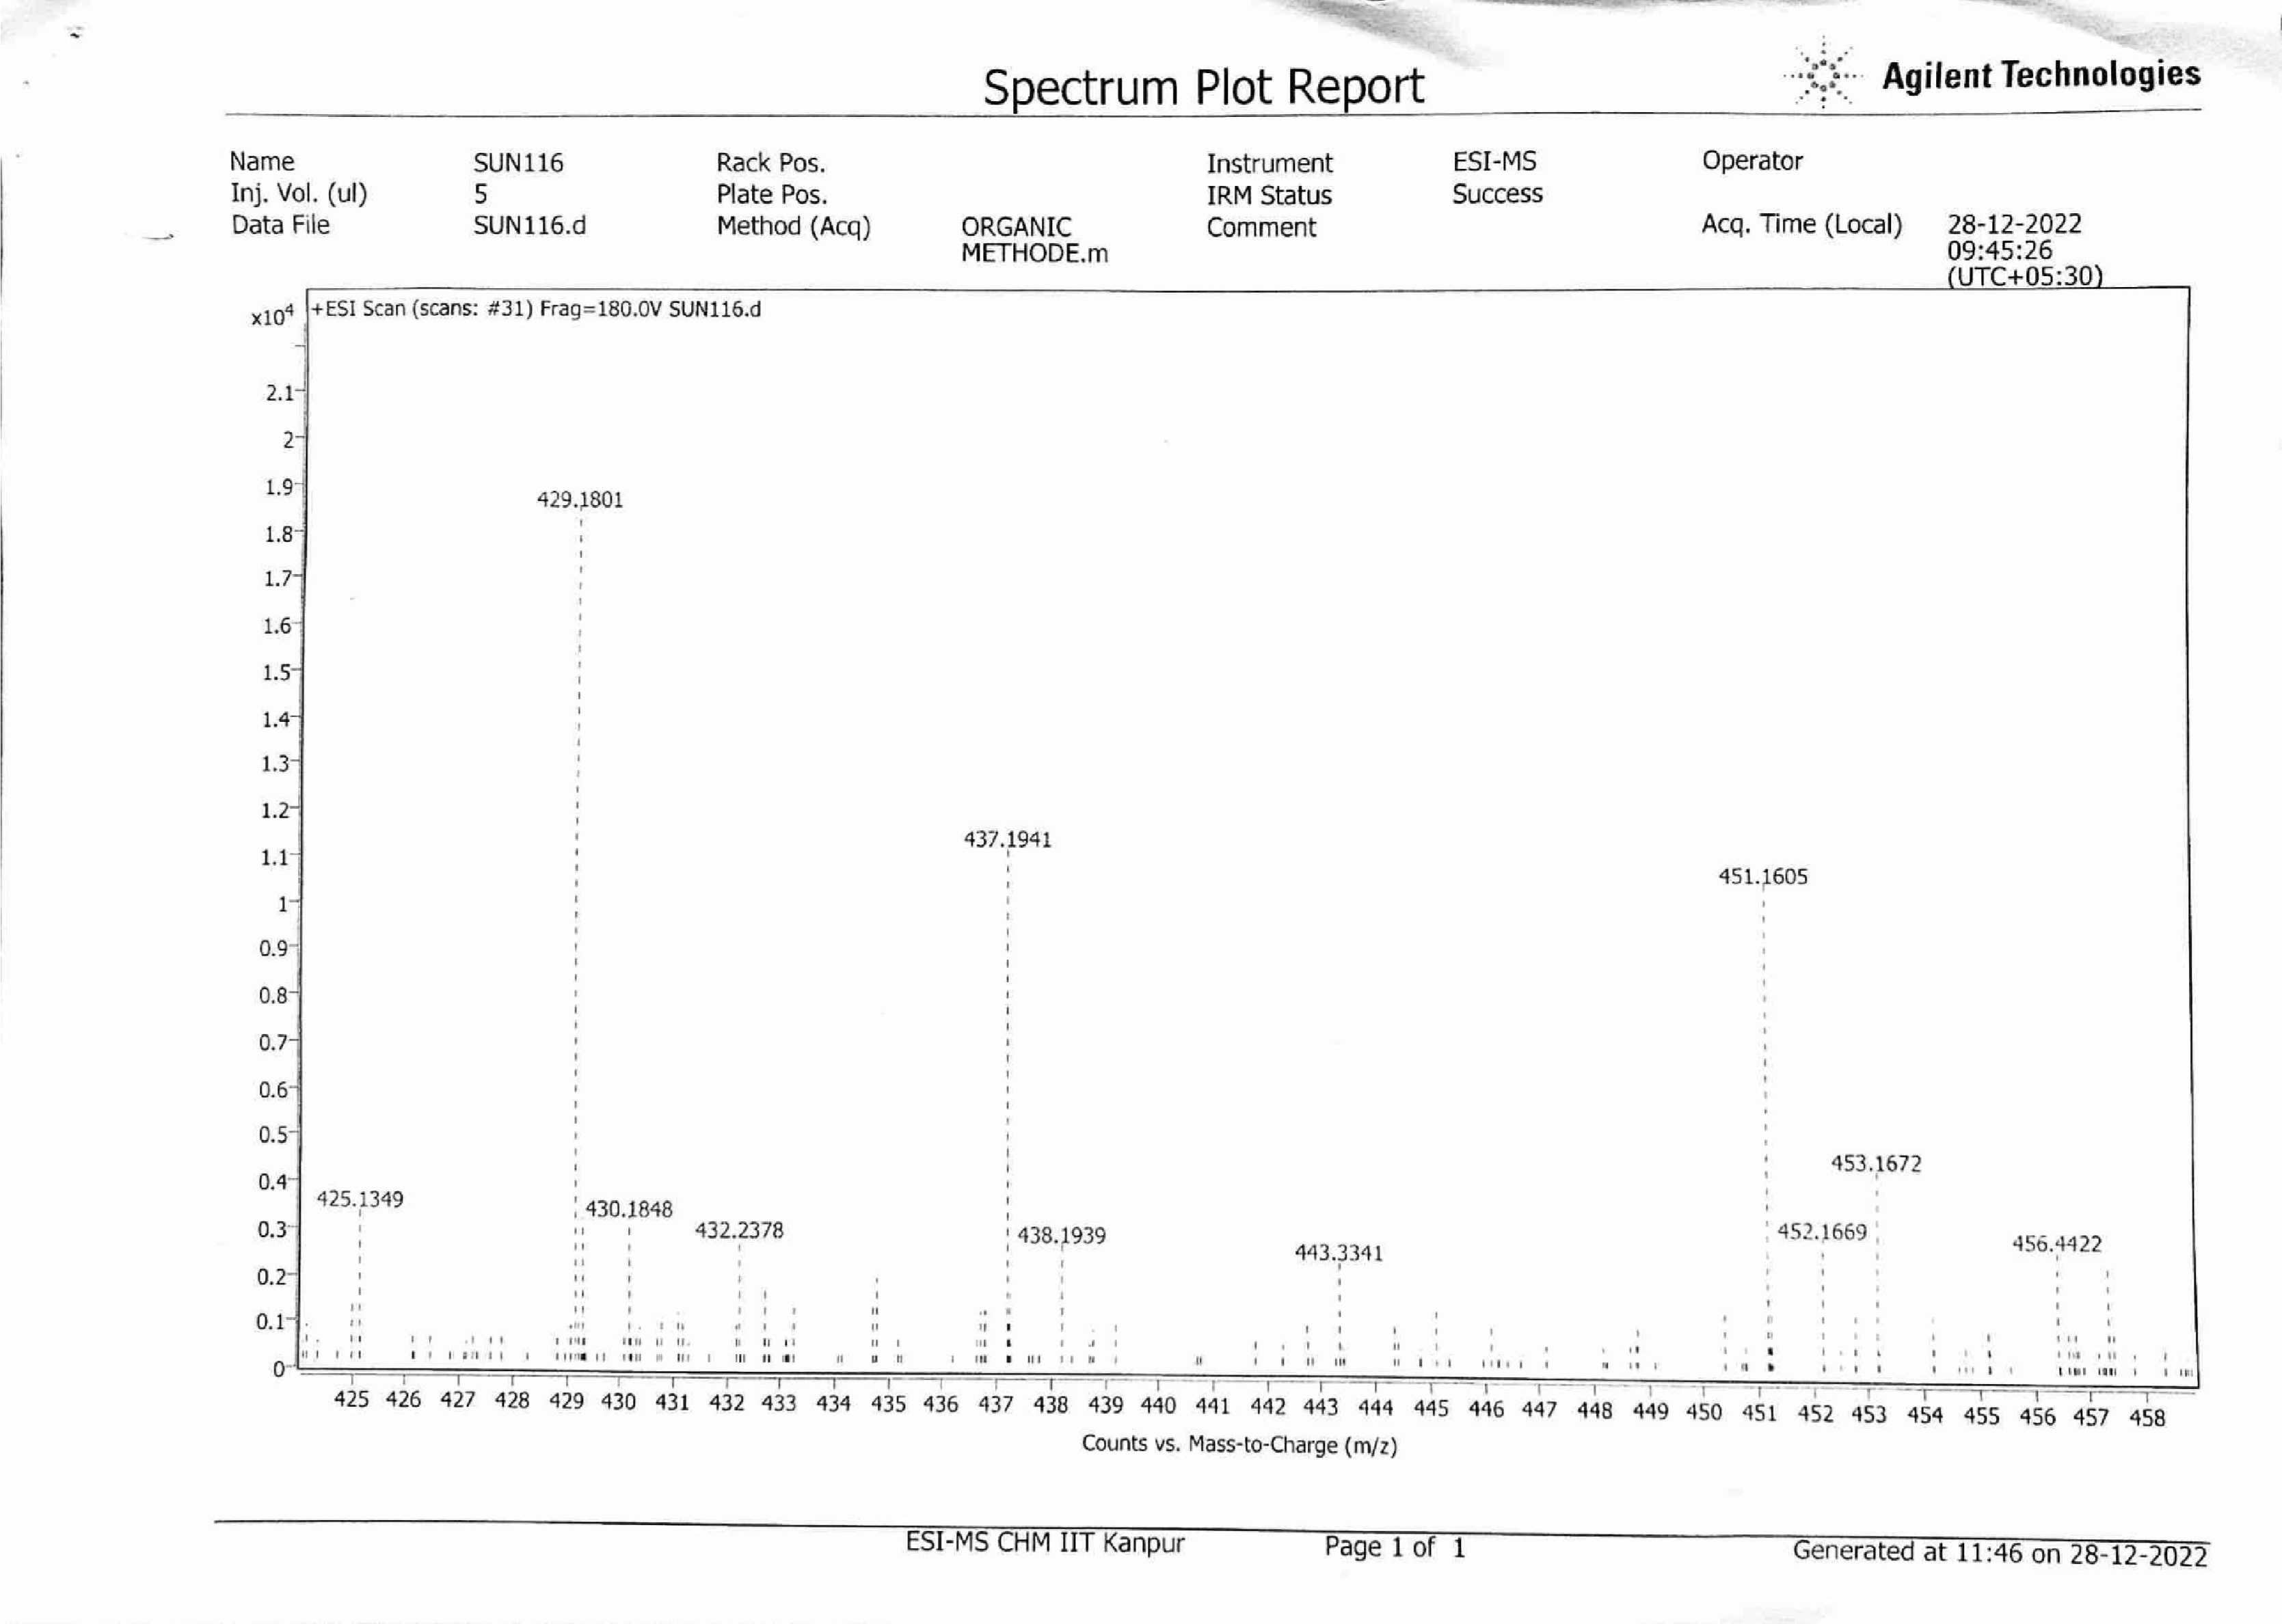


**APPENDIX II**

Corresponding FTIR Spectra of Compounds

***N-ethyl-3-methyl-2-(2-(phenylsulfonamido)propanamido)butanamide (3a)***


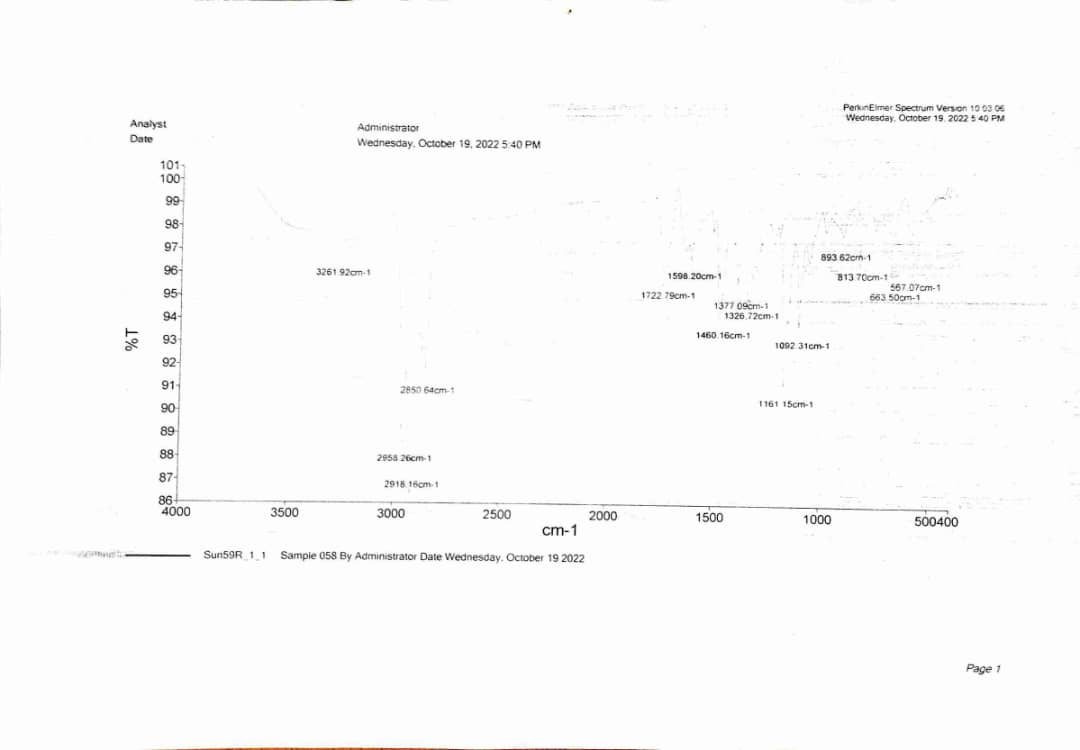


***N-ethyl-3-methyl-2-(2-(4-methylphenylsulfonamido)propanamido)butanamide (3b)***


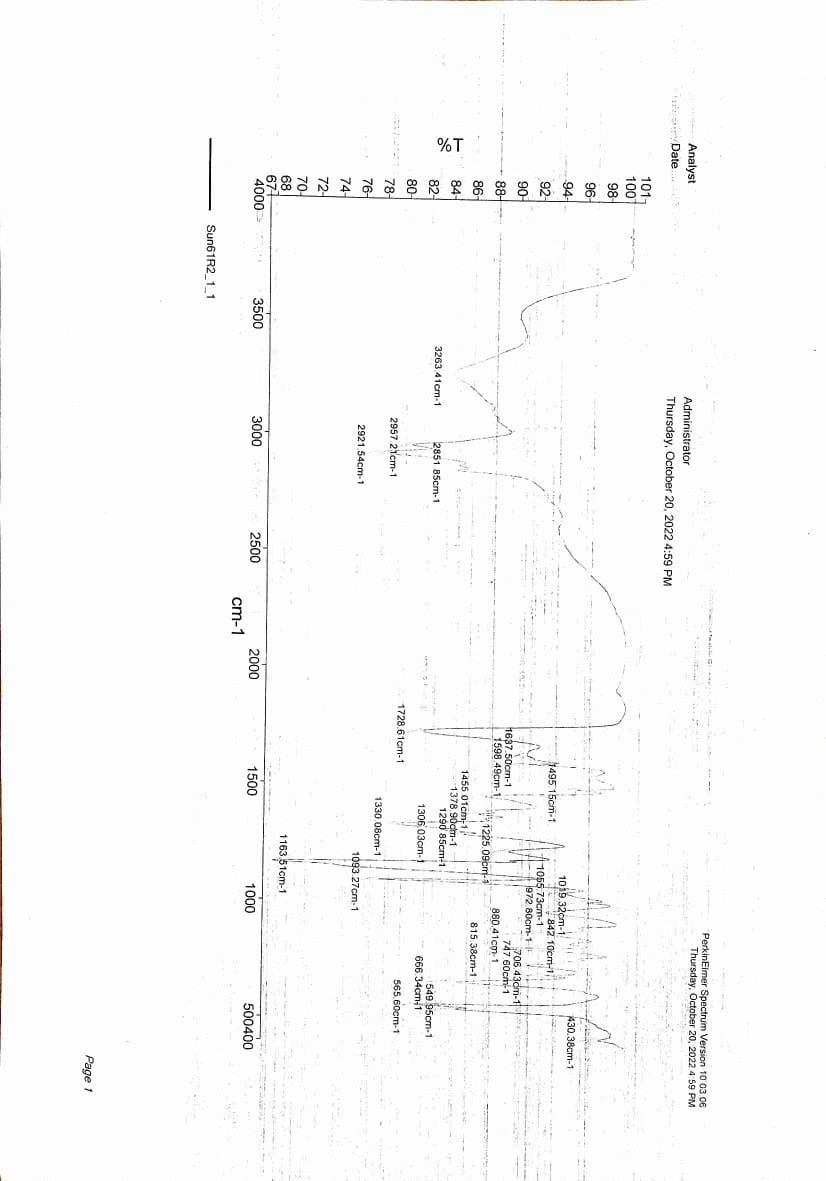


***N-ethyl-3-methyl-2-(2-(4-nitrophenylsulfonamido)propanamido) butanamide (3c)***


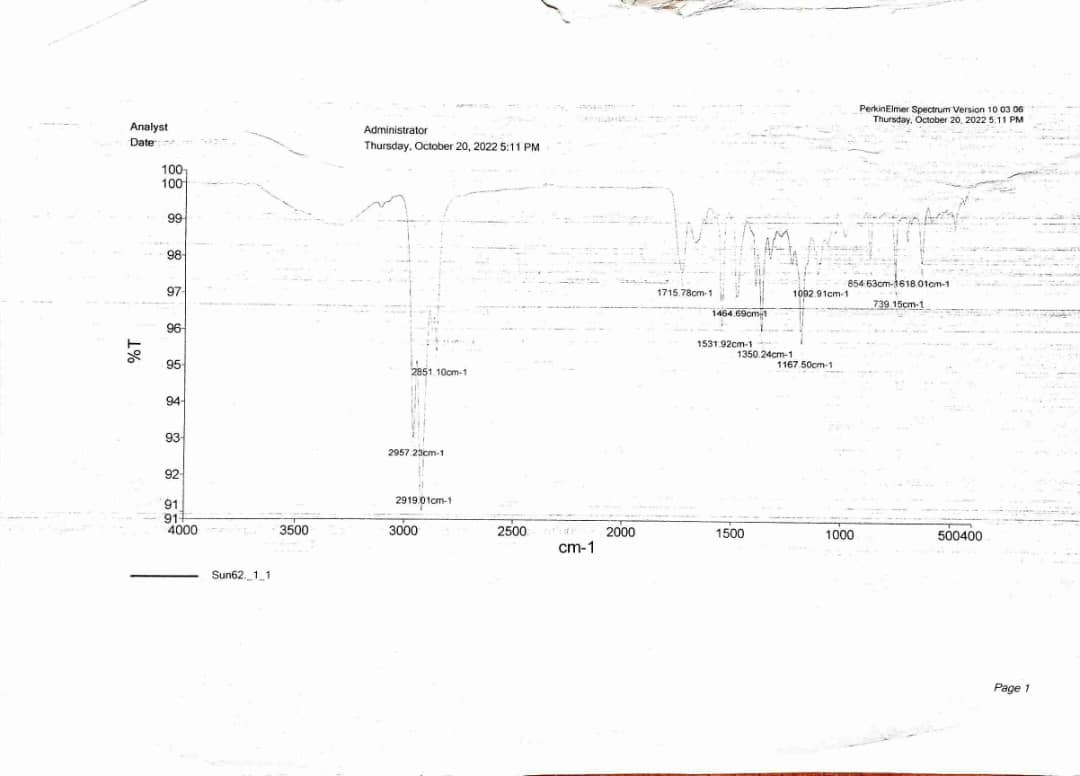


***3-methyl-2-(2-(phenylsulfonamido)propanamido)-N-propylbutanamide (3d)***


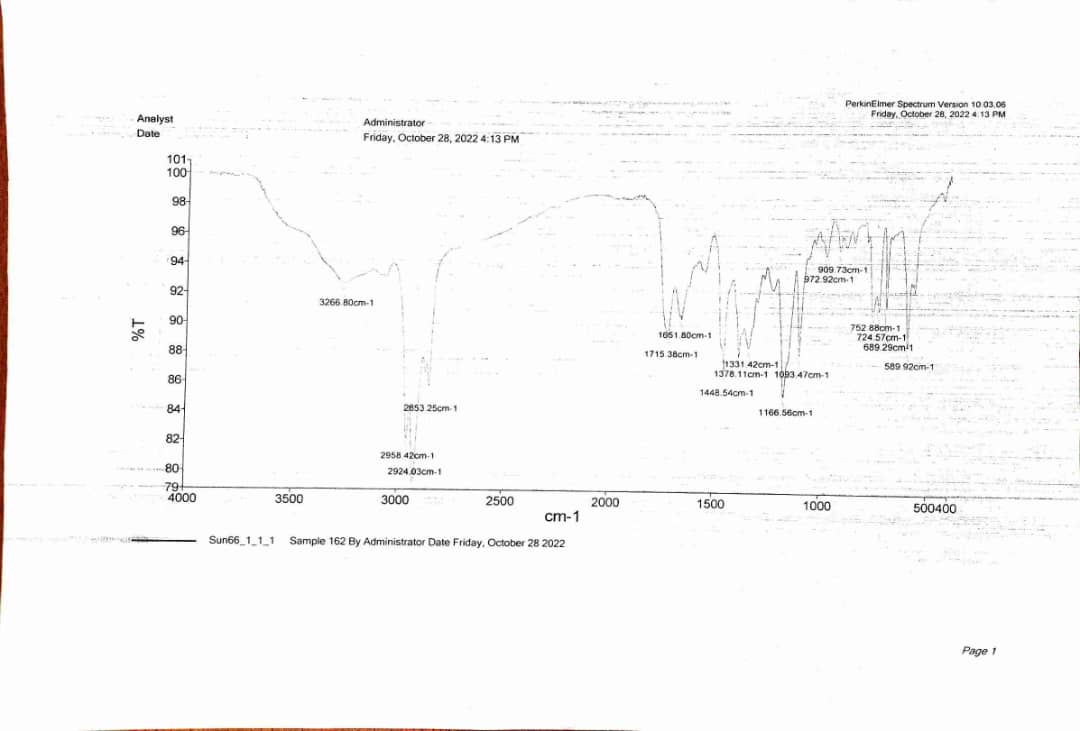


***3-methyl-2-(2-(4-methylphenylsulfonamido)propanamido)-N-propylbutanamide*** *(3e)*


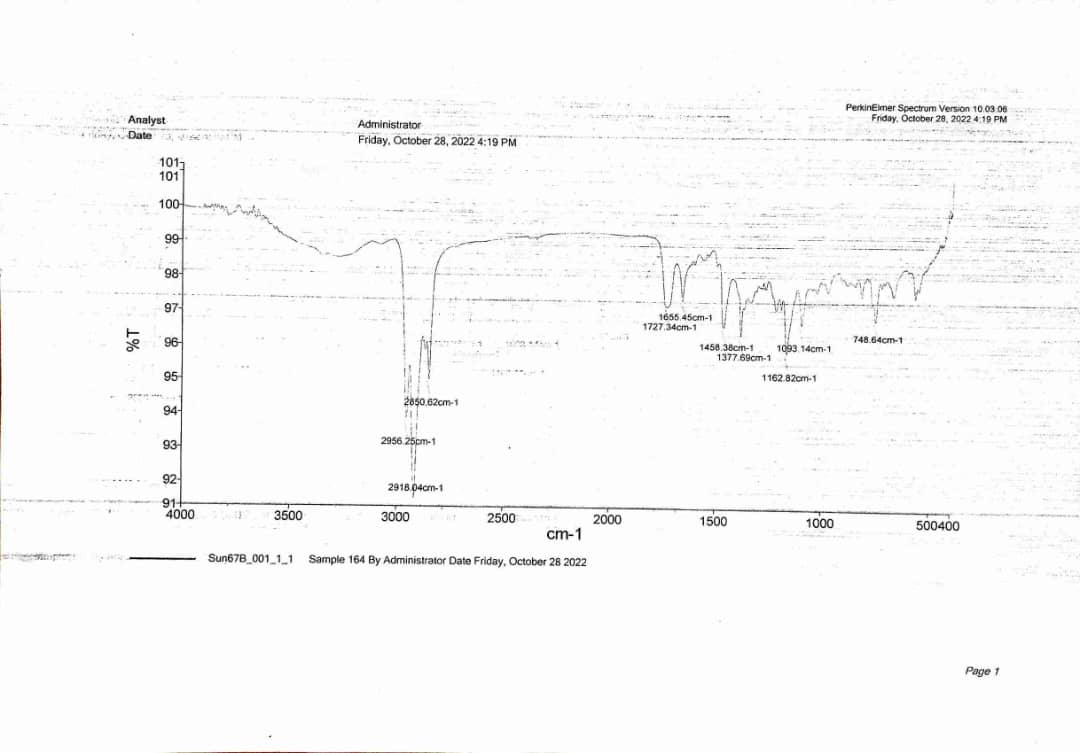


***3-methyl-2-(2-(4-nitrophenylsulfonamido) propanamido)-N-propylbutanamide (3f)***


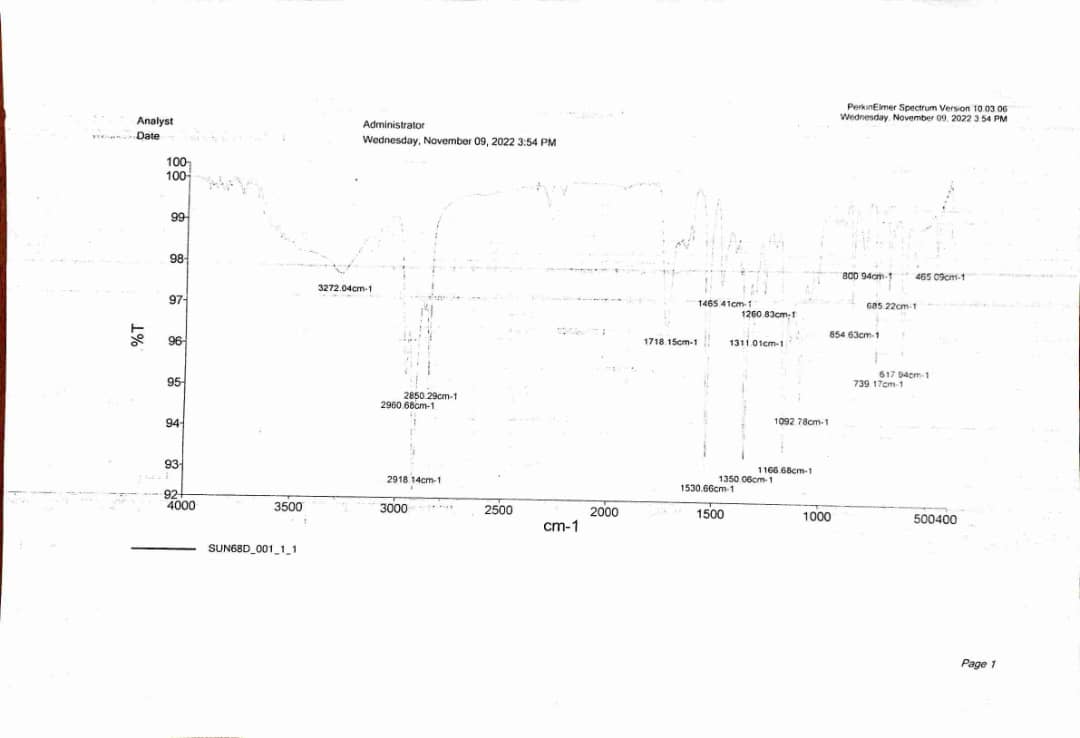


***N,N,3-trimethyl-2-(2-(phenylsulfonamido)propanamido)butanamide*** *(3g)*


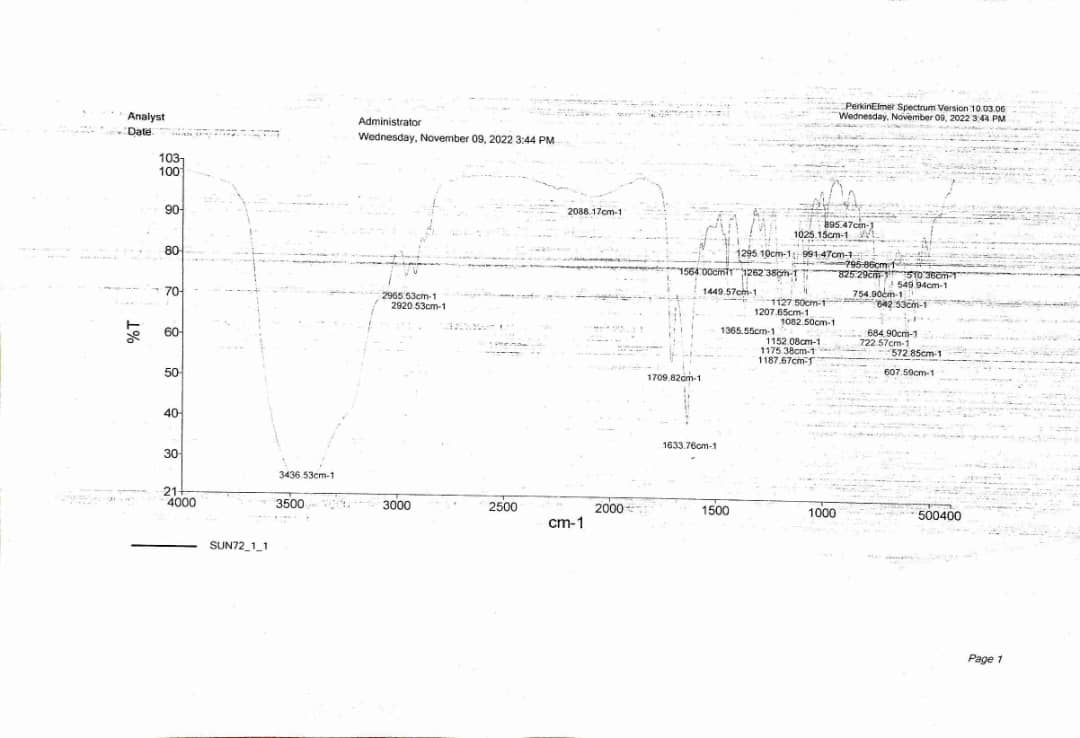


***N,N,3-trimethyl-2-(2-(4-methylphenylsulfonamido) propanamido) butanamide (3h)***


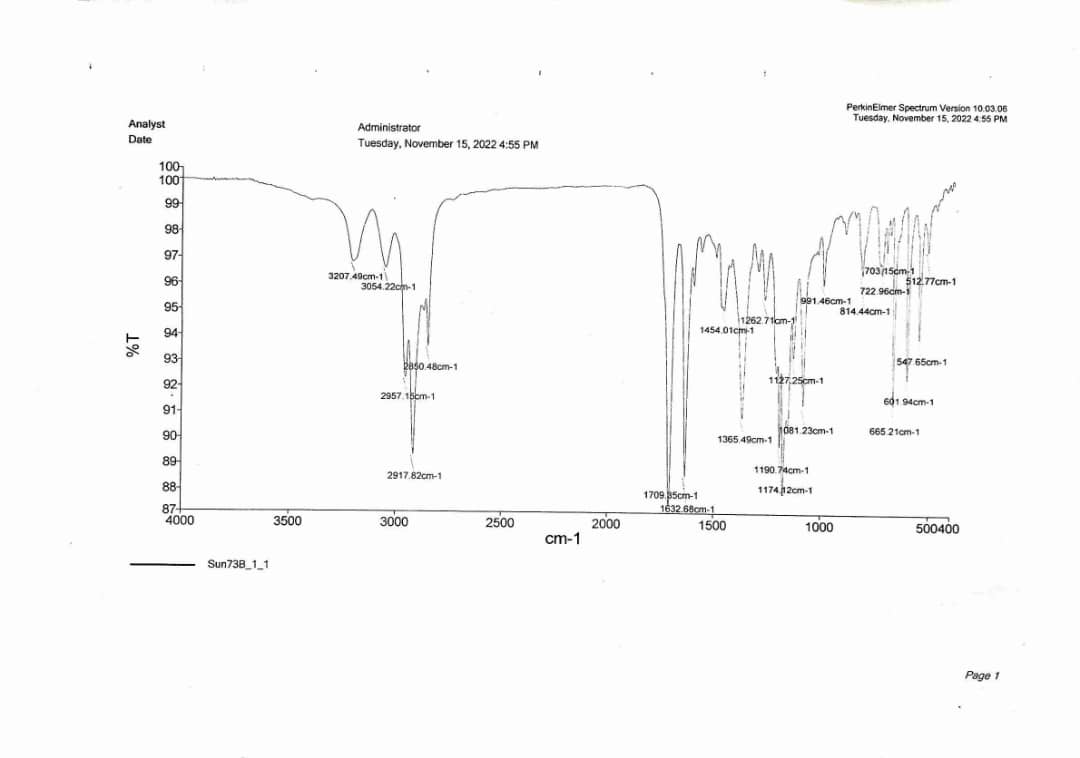


***N,N,3-trimethyl-2-(2-(4-nitrophenylsulfonamido)propanamido)butanamide (3i)***


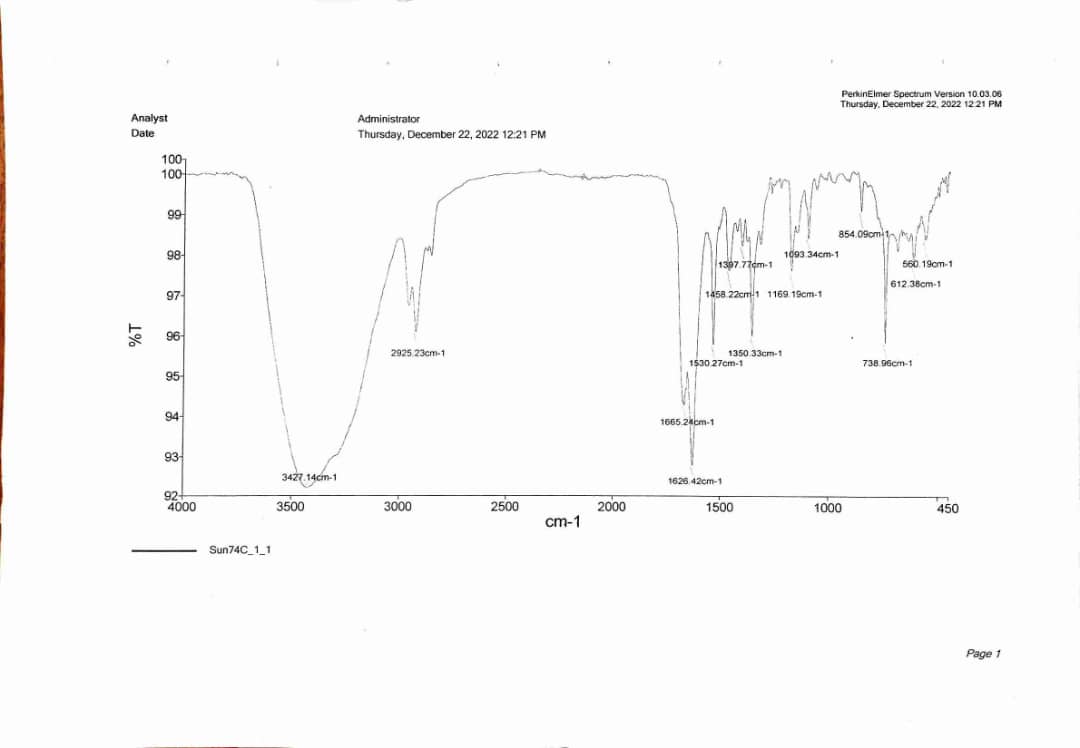


***N-butyl-3-methyl-2-(2-(phenylsulfonamido)propanamido)butanamide (3j)***


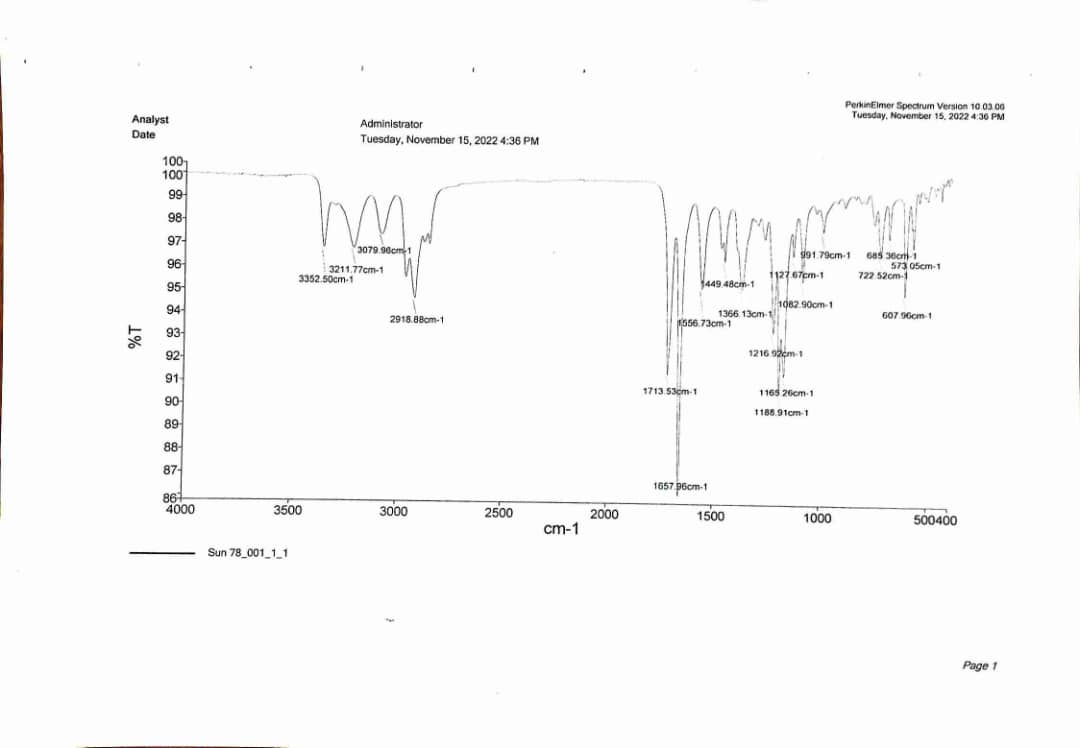


***N-butyl-3-methyl-2-(2-(4-methylphenylsulfonamido) propanamido) butanamide (3k)***


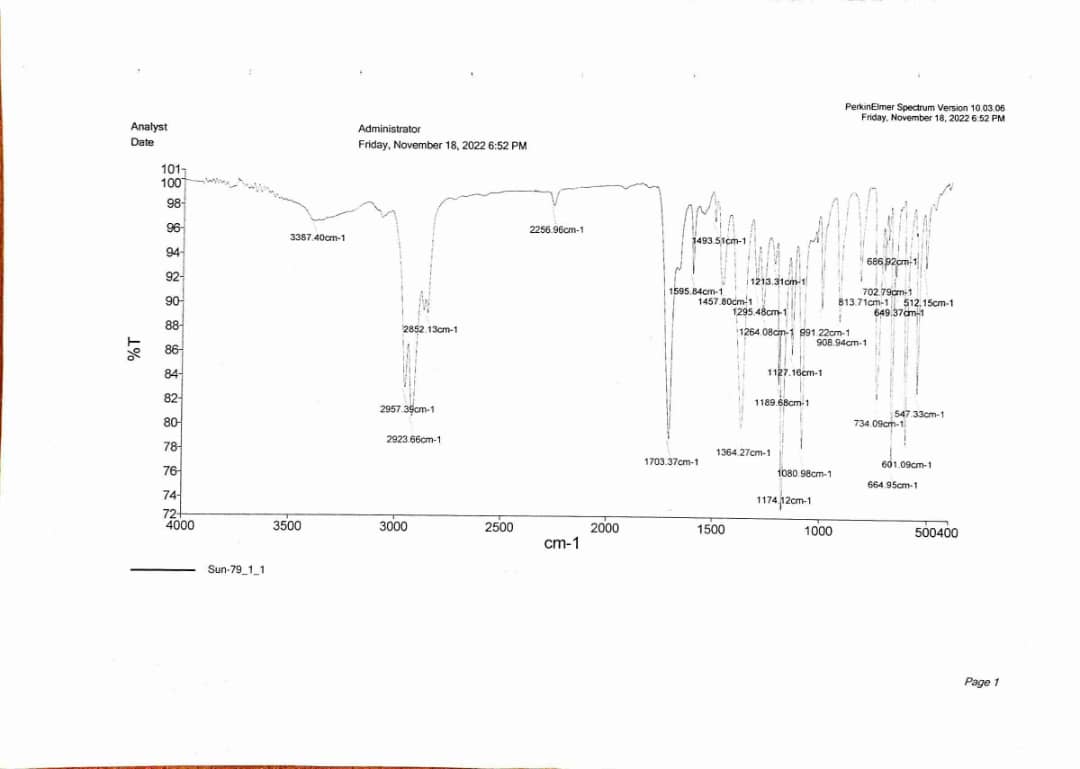


***N-butyl-3-methyl-2-(2-(4-nitrophenylsulfonamido) propanamido)butanamide (3l)***


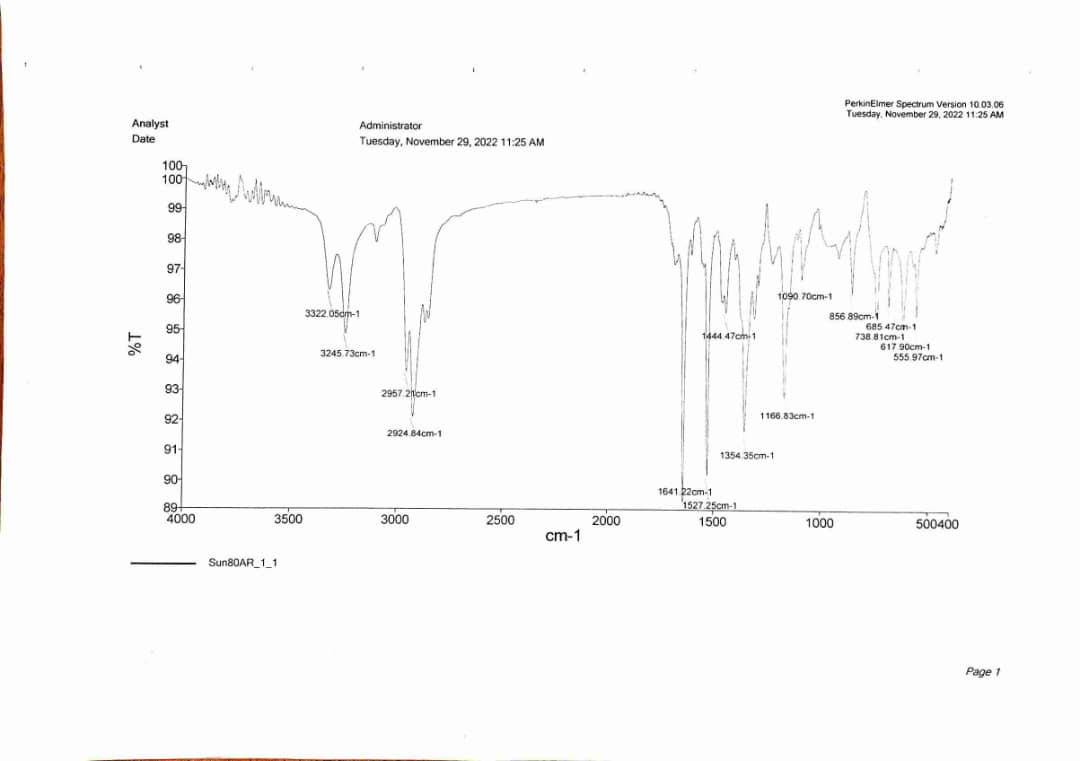


***N-(3-methyl-1-oxo-1-(piperidin-1-yl)butan-2-yl)-2-(phenylsulfonamido)propanamide (3m)***


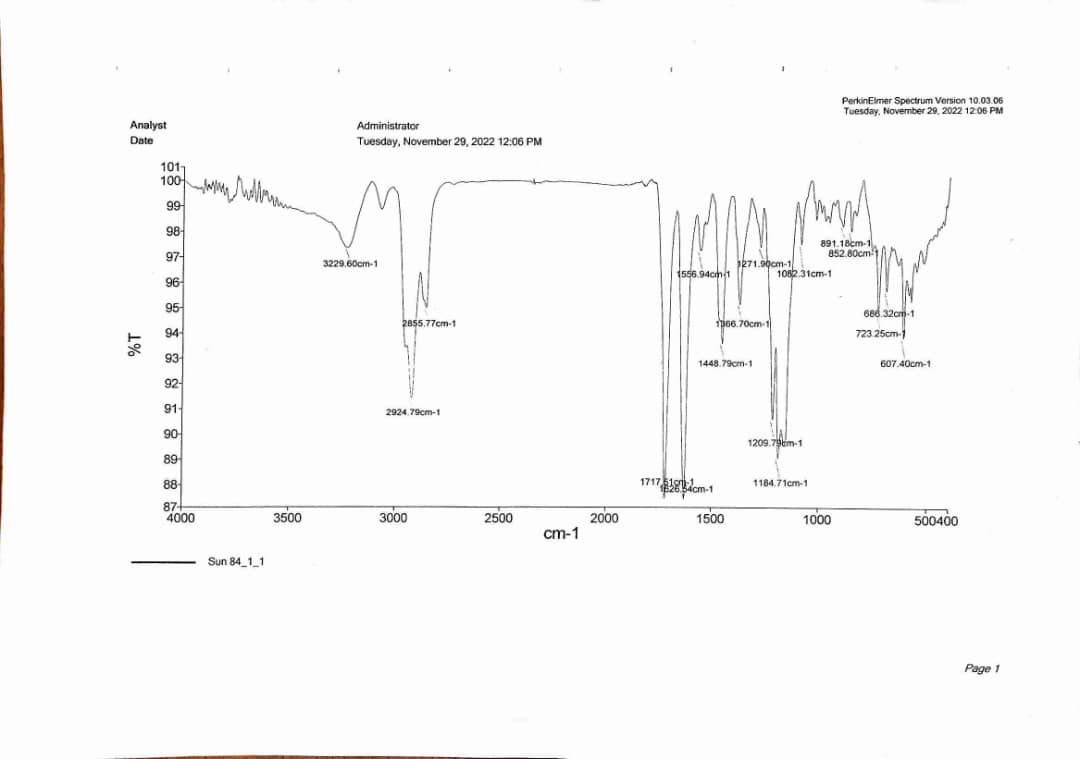


***N-(3-methyl-1-oxo-1-(piperidin-1-yl)butan-2-yl)-2-(4-nitrophenylsulfonamido) propanamide (3n)***


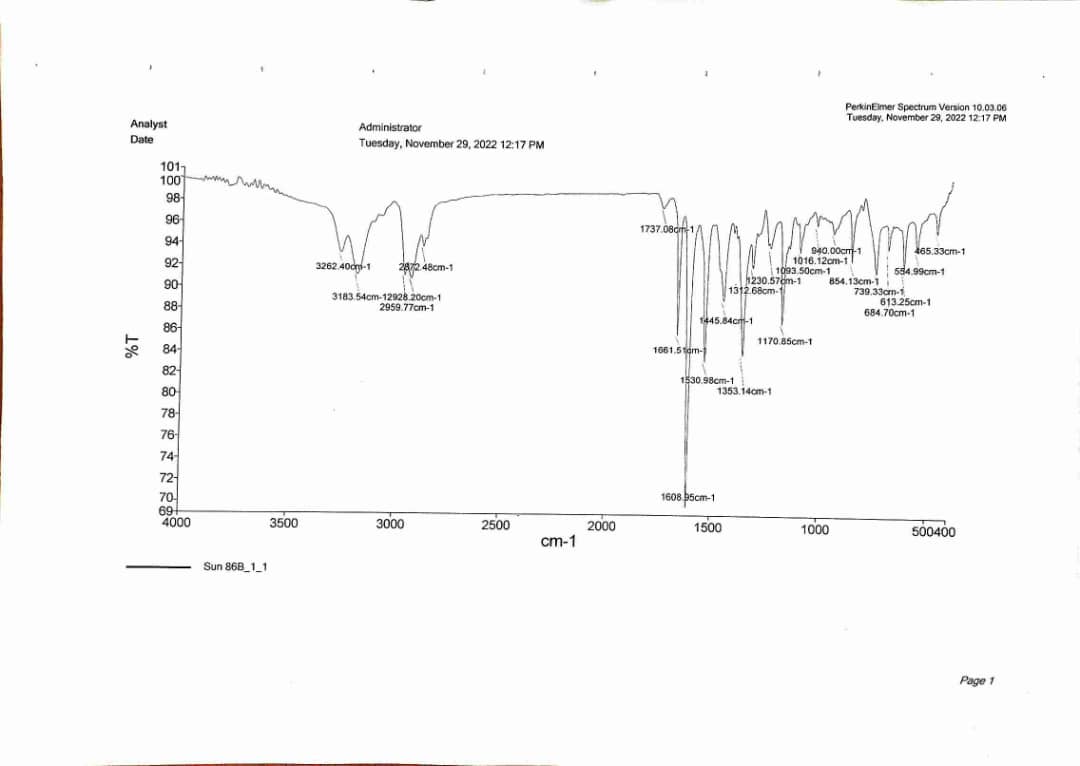


***N-(3-methyl-1-oxo-1-(1H-pyrazol-1-yl)butan-2-yl)-2-(phenylsulfonamido) propanamide (3o)***


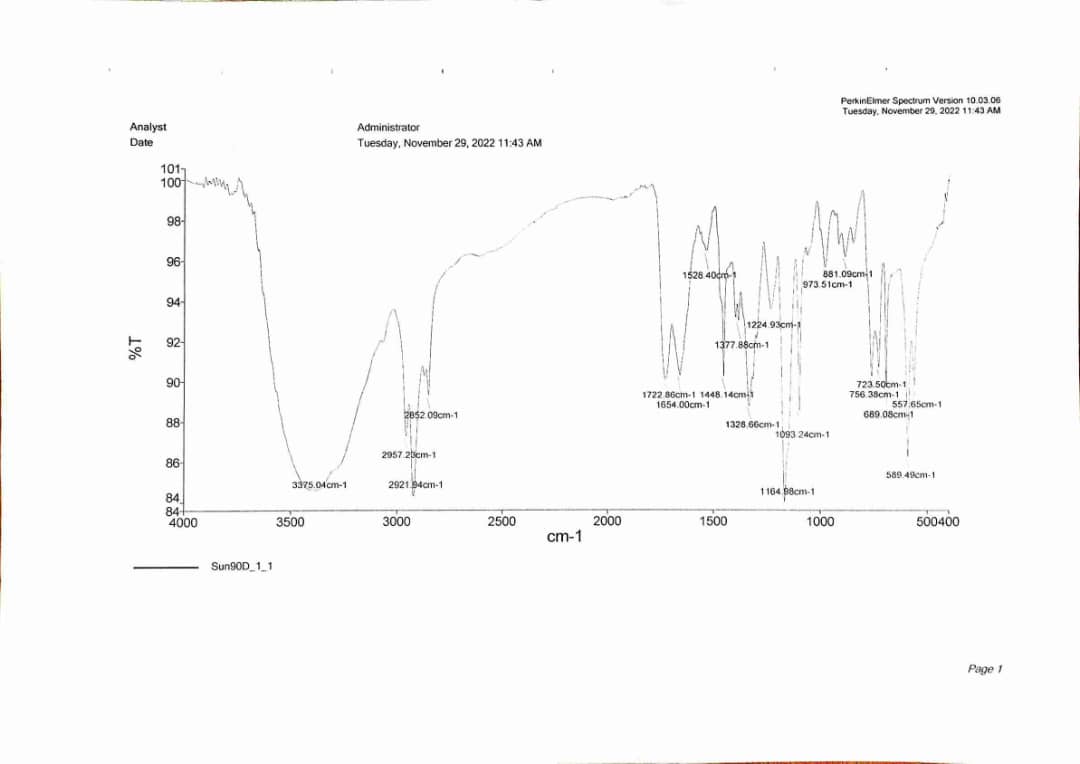


***N-(3-methyl-1-oxo-1-(1H-pyrazol-1-yl)butan-2-yl)-2-(4-methylphenylsulfonamido) propanamide (3p)***


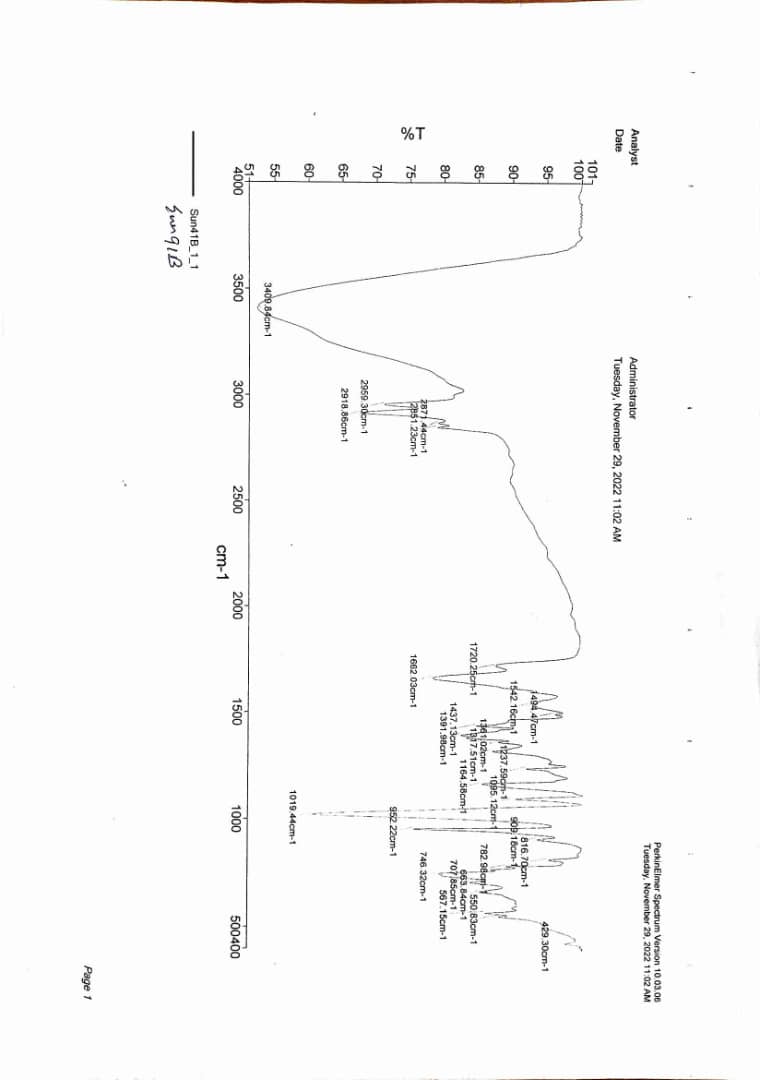


***N-(3-methyl-1-oxo-1-(1H-pyrazol-1-yl)butan-2-yl)-2-(4-nitrophenylsulfonamido) propanamide*** *(3q)*


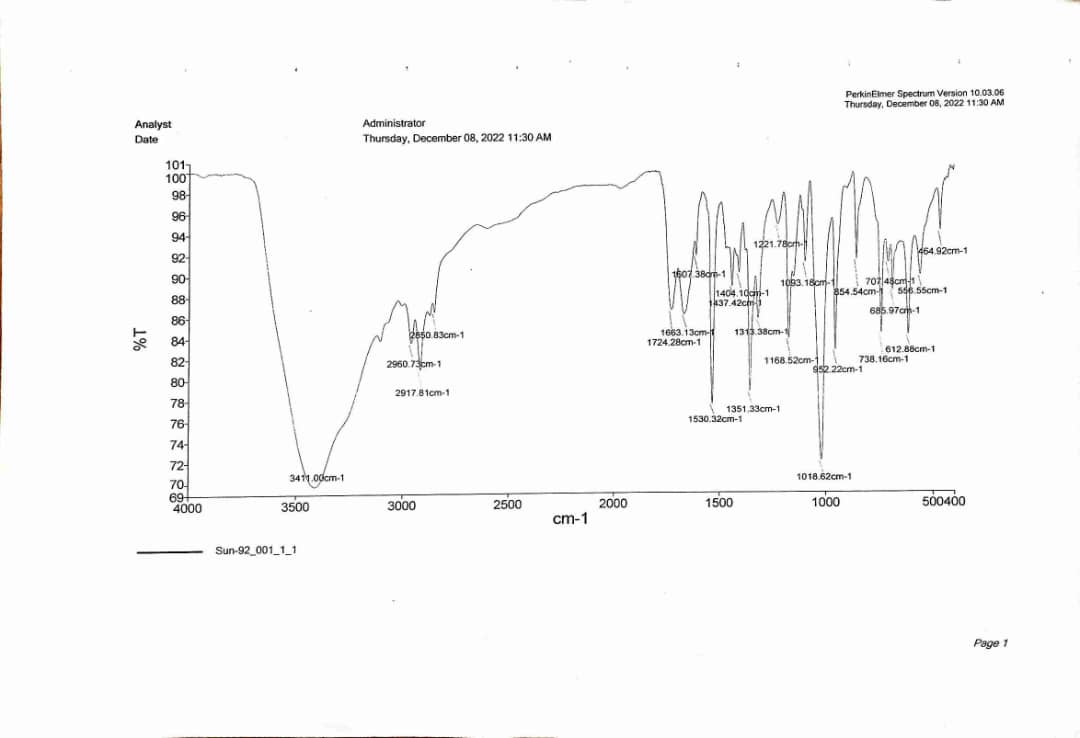


***N-(3-methyl-1-oxo-1-(pyrrolidin-1-yl)butan-2-yl)-2-(phenylsulfonamido) propanamide (3r)***


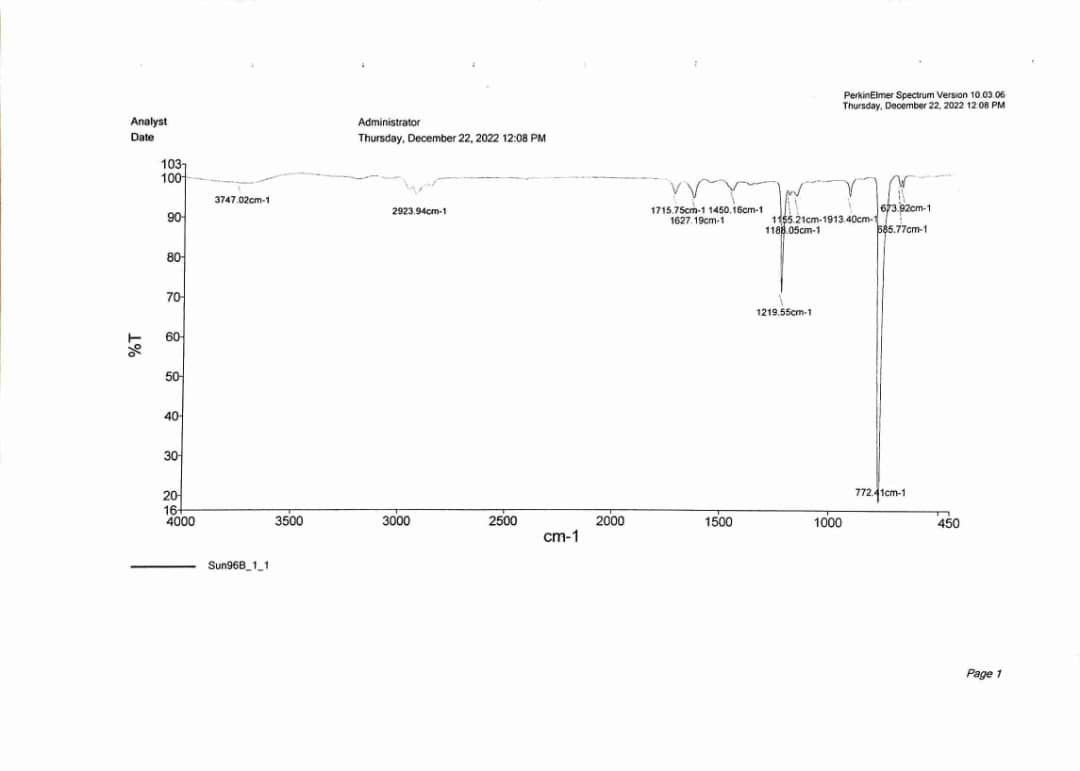


***N-(3-methyl-1-oxo-1-(pyrrolidin-1-yl)butan-2-yl)-2-(4-methylphenylsulfonamido) propanamide (3s)***


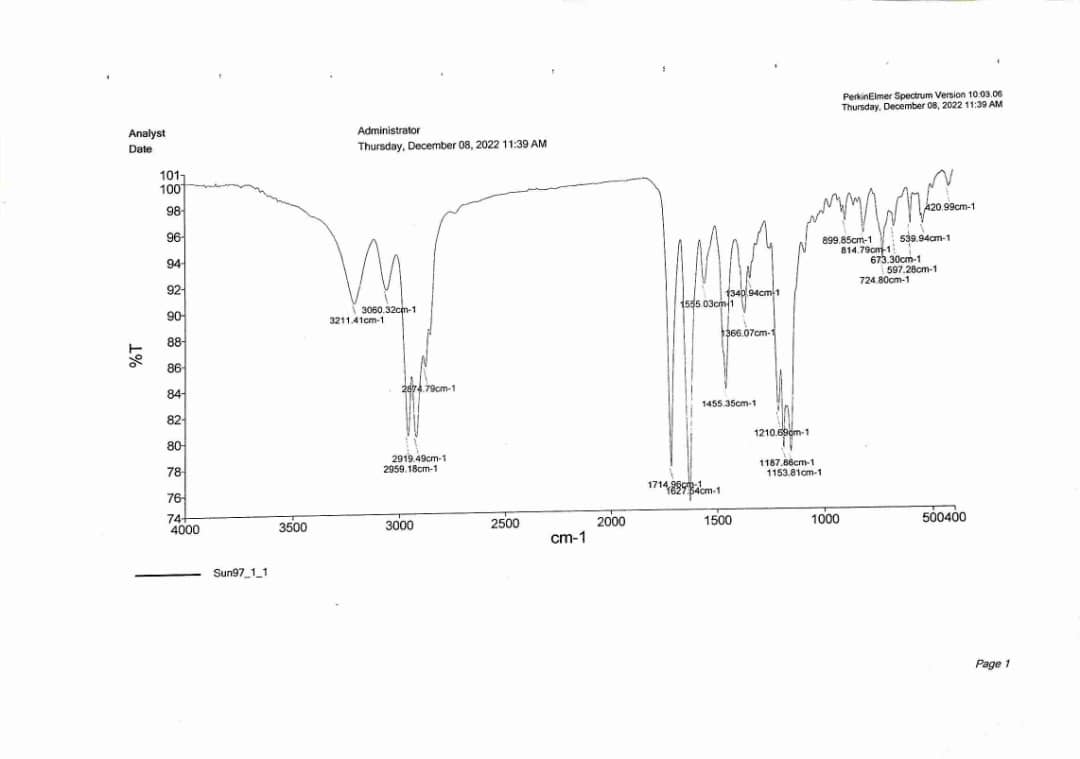


***N-(3-methyl-1-oxo-1-(pyrrolidin-1-yl)butan-2-yl)-2-(4-nitrophenylsulfonamido) propanamide (3t)***


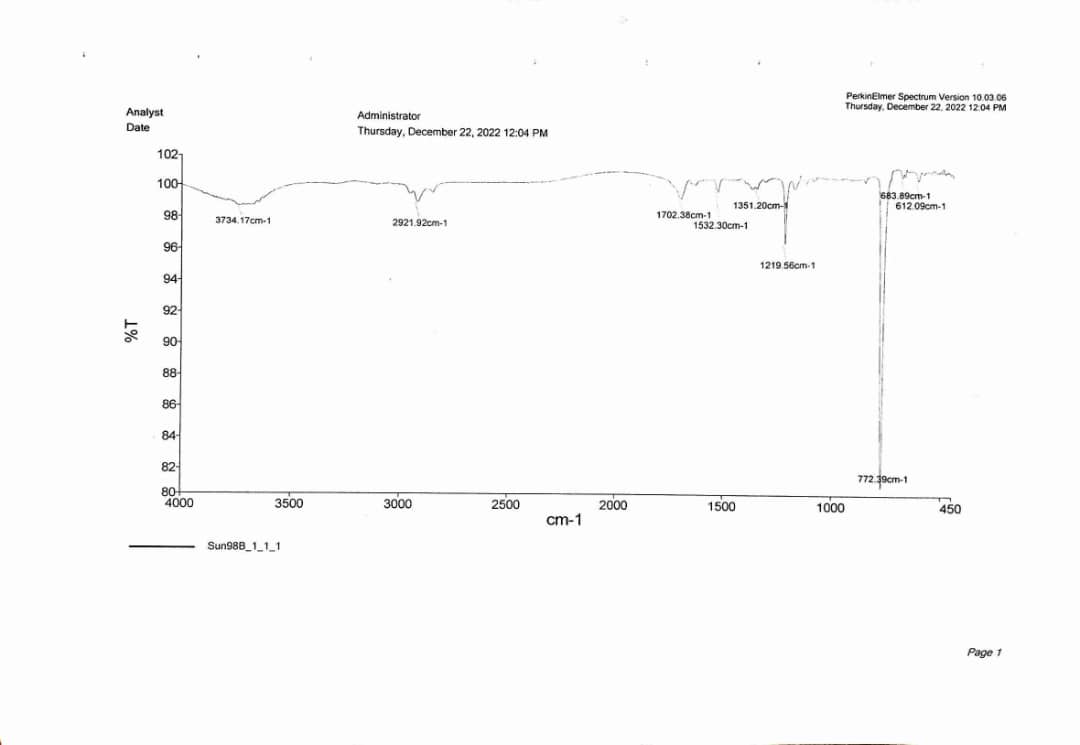


***N,N-diethyl-3-methyl-2-(2-(phenylsulfonamido)propanamido)butanamide (3u)***


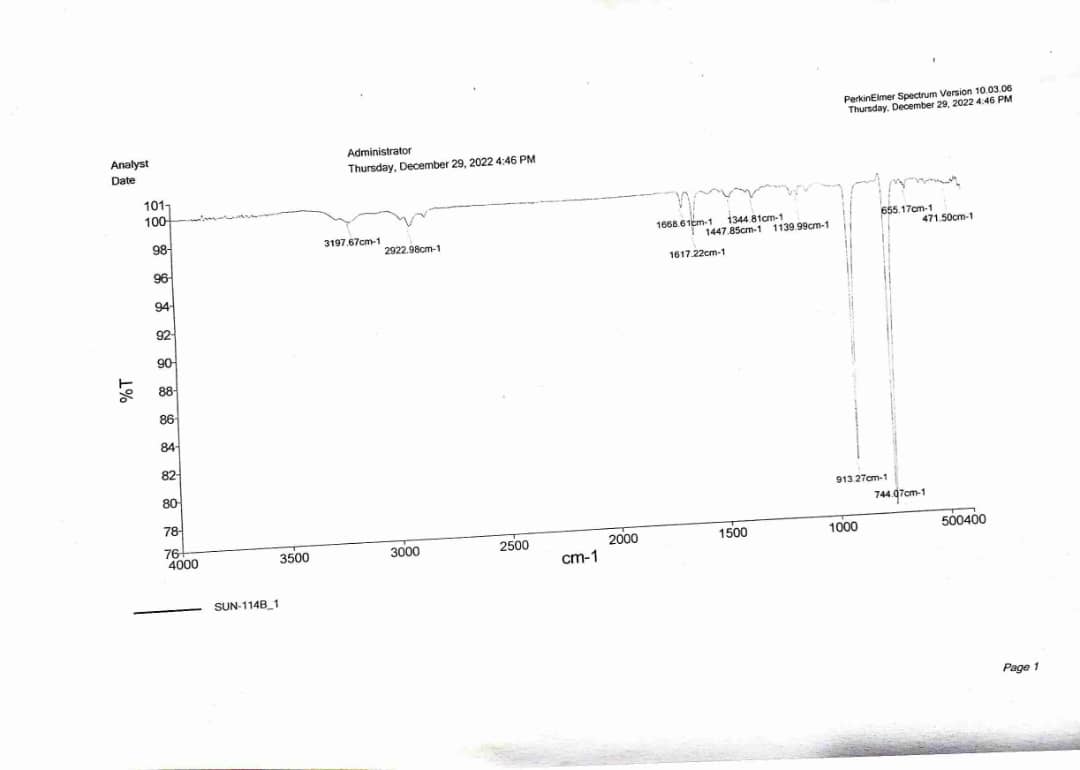


***N,N-diethyl-3-methyl-2-(2-(4-methylphenylsulfonamido)propanamido)butanamide (3v)***


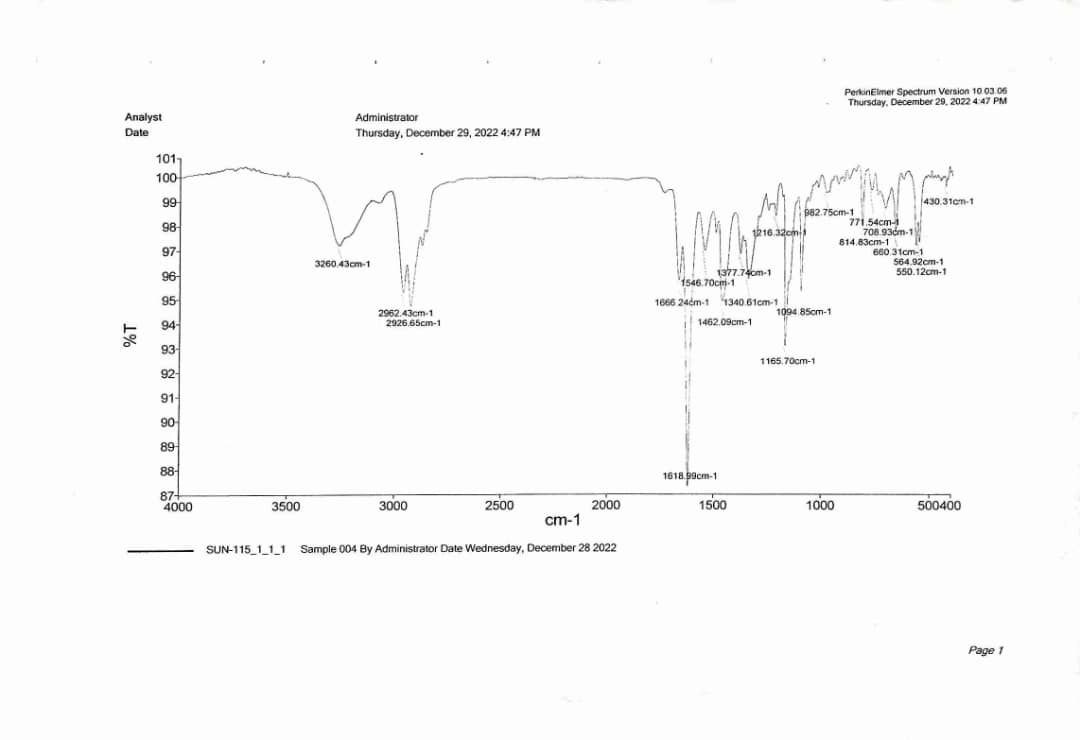


***N,N-diethyl-3-methyl-2-(2-(4-nitrophenylsulfonamido)propanamido)butanamide (3w)***


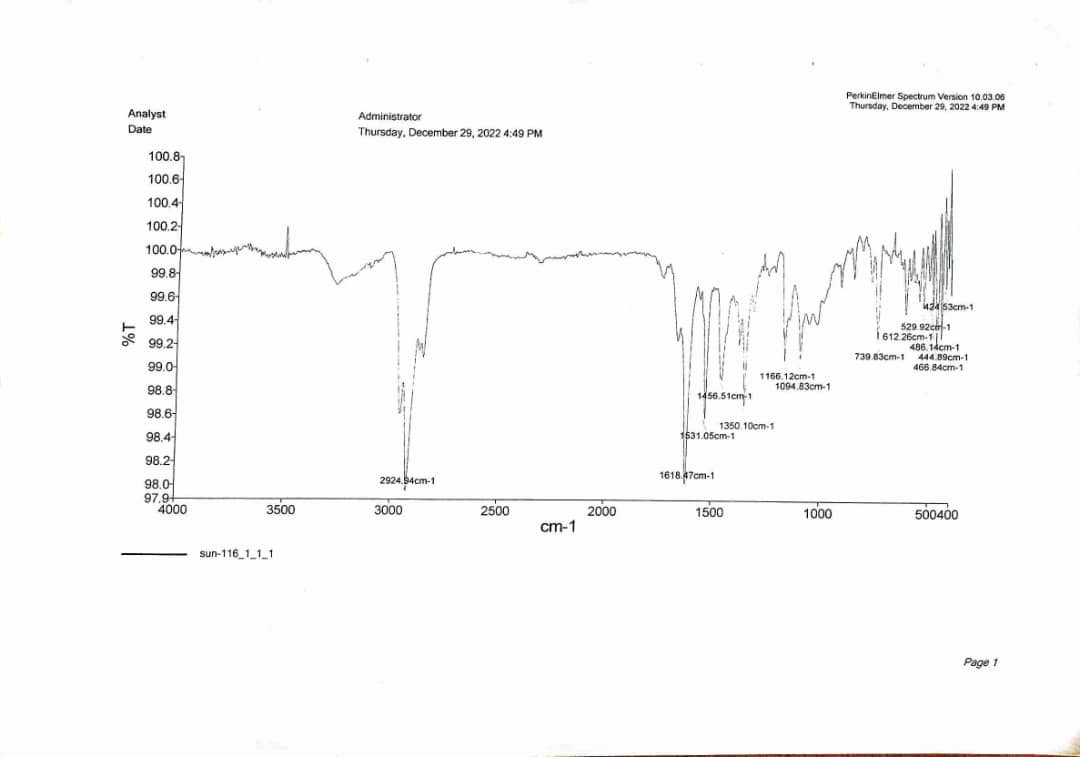

Supplement: Supplementary file 1 [file ad65def7a99e8c7111e00341.docx]
